# Supplementary material for: Complex Control of GABA(A) Receptor Subunit mRNA Expression: Variation, Covariation, and Genetic Regulation
Source: PLoS One. 2012 Apr 10;7(4):e34586. doi: 10.1371/journal.pone.0034586 (PMC3323555; doi:10.1371/journal.pone.0034586)
Supplement: Table S2 — Summary of GABA(A)R heritability and eQTLs in the hippocampus. Expression (Expr), standard deviation (SD), and fold change(FC) calculated across all strains, including parents and F1. * = probes overlapping SNPs removed and probe set reconstructed as the first principal component (PC1). PC1 used to map expression quantatative trait loci (eQTL). Only eQTL that have achieved genome wide significance (∼LRS>15) are shown. (XLSX) [file pone.0034586.s009.xlsx]

## Sheet: Table S2
Table S2. Summary of GABA(A)R heritability and eQTLs in the hippocampus.
Probe Set ID	Platform	Symbol	Target	Position	Strand	Mean Expr	SD	FC	Variant::Probe	Heritability	cis eQTL	trans eQTL
1449980_a_at	M430	Gabrd	Last c exon and prox 3' UTR	Chr4@154.759321Mb	-	9.3282	0.221322	2.33432		0.130553	N.S.	N.S.
1460408_at	M430	Gabrg1	Mid dist 3' UTR	Chr5@71.143111Mb	-	9.02232	0.19867	1.86477		0.0963867	N.S.	LRS=19.5(0.106) Chr14@59.823959(rs13482205)
1455444_at	M430	Gabra2	Far dist 3' UTR	Chr5@71.349699Mb	-	11.405	0.550841	3.63259		0.896438	LRS=33.6(0.352) Chr5@71.133298(rs13478320)	LRS=16.7(0.259) Chr10@86.197002(CEL-10_86482491)
1443865_at	M430	Gabra2	Mid dist 3' UTR	Chr5@71.350451Mb	-	10.6724	0.577947	4.06992		0.808191	LRS=32.2(0.366) Chr5@71.133298(rs13478320)	LRS=16.4(0.272) Chr10@86.197002(CEL-10_86482491)
1421738_at	M430	Gabra2	Last c exon and prox 3' UTR	Chr5@71.352858Mb	-	10.8244	0.506262	4.54097		0.831345	LRS=26.6(0.286) Chr5@71.133298(rs13478320)	LRS=15.1(0.221) Chr10@86.197002(CEL-10_86482491)
1433707_at	M430	Gabra4	dist 3' UTR	Chr5@71.961153Mb	-	11.0289	0.121952	1.56917		0.0601507	N.S.	N.S.
1429330_at	M430	Gabra4	Last c exon and prox 3' UTR	Chr5@71.96263Mb	-	9.25134	0.29685	3.01467		0.301828	N.S.	N.S.
1419719_at	M430	Gabrb1	Last c exon and prox 3' UTR	Chr5@72.527918Mb	+	12.2534	0.14913	1.66209		0.515607	N.S.	N.S.
1435095_at	M430	Gabrb1	Far dist 3' UTR	Chr5@72.539738Mb	+	11.4063	0.104314	1.47734		N.A.	N.S.	N.S.
1433602_at	M430	Gabra5	dist 3' UTR	Chr7@64.663077Mb	-	11.8982	0.167353	1.63807		0.321138	N.S.	LRS=17.4(-0.082) Chr7@57.048459(rs3676147) LRS=17.0(-0.080) Chr19@15.843735(rs3676147)
1421189_at	M430	Gabrb3	Last two exons and prox 3' UTR	Chr7@65.071725Mb	+	10.1928	0.440878	3.64268		0.173808	LRS=21.1(0.248) Chr7@63.779523(gnf07.050.858)	N.S.
1421190_at*	M430	Gabrb3	Far 3' UTR	Chr7@65.08217Mb	+	11.3911	0.509307	4.22221	MRS1965189::623527, 701881; MRS1965190::360123	0.395873	*LRS=82.5(N.S.) Chr7@63.779523(gnf07.050.858)	*LRS=16.3(N.S.) Chr5@90.925270(rs4225368)
1435021_at*	M430	Gabrb3	Far 3' UTR	Chr7@65.083577Mb	+	12.7276	0.100835	1.41716	MRS1965197::114219, 817415	0.181059	*N.S.	*N.S.
1424647_at	M430	Gabrp	prox 3' UTR	Chr11@33.45206Mb	-	8.58596	0.101976	1.36888		N.A.	N.S.	N.S.
1437147_at	M430	Gabrg2	Mid dist 3' UTR	Chr11@41.724032Mb	-	10.1104	0.249261	2.11257		0.131605	LRS=38.2(N.S.) Chr11@42.185501(rs3693664)	LRS=19.5(N.S.) Chr5@118.405615(rs13478483)
1418177_at	M430	Gabrg2	Last two c exons and prox 3' UTR	Chr11@41.725716Mb	-	11.7894	0.176483	1.79626		0.128477	N.S.	LRS=21.5(0.093) Chr5@138.337847(rs8265855)
1455766_at*	M430	Gabra1	Far dist 3' UTR	Chr11@41.944474Mb	-	12.721	0.117783	1.53901	MINA174244::511101; MRS2957540::576791	0.285995	*N.S.	*N.S.
1436889_at*	M430	Gabra1	dist 3' UTR	Chr11@41.945172Mb	-	12.6868	0.285917	2.06337	MRS2957543::X47229	0.491195	*LRS=68.7(N.S.) Chr11@42.185501(rs3693664)	*N.S.
1421281_at*	M430	Gabra1	Mid prox 3' UTR	Chr11@41.946133Mb	-	12.0284	0.344396	2.2548	MRS2957547:: 739583, 261901; MRS2957549::691439, 832501	0.197051	*LRS=50.1(N.S.) Chr11@42.185501(rs3693664)	*LRS=18.8(N.S.) Chr16@92.790231(rs4219897)
1421280_at*	M430	Gabra1	Last c exon and prox 3' UTR	Chr11@41.946779Mb	-	11.4813	0.339825	2.68328	MRS2957553::942615	0.110946	*LRS=25.8(N.S.) Chr11@44.552712(D11Mit20)	*LRS=19.6(N.S.) Chr5@138.337847(rs8265855) *LRS=17.7(N.S.) Chr16@96.944467(rs4221305)
1450319_at*	M430	Gabrb2	Last c exon and prox 3' UTR	Chr11@42.440142Mb	+	8.14106	0.300555	2.51751	MRS2961649::254739	0.0222962	*N.S.	*LRS=18.0(N.S.) Chr5@136.726447(rs3708411)
1429685_at*	M430	Gabrb2	dist 3' UTR	Chr11@42.443637Mb	+	11.21	0.465057	3.37	MRS2961685::524Y87	0.298303	*LRS=79.6(N.S.) Chr11@42.185501(rs3693664)	*LRS=16.3(N.S.) Chr8@14.480179(rs6343961)
1428205_x_at*	M430	Gabrb2	dist 3' UTR	Chr11@42.444613Mb	+	11.7792	0.287888	2.38833	MRS2961691::218849	N.A.	*LRS=47.4(N.S.) Chr11@42.185501(rs3693664)	*N.S.
1428204_at*	M430	Gabrb2	dist 3' UTR	Chr11@42.444613Mb	+	12.0183	0.284699	2.35708	MRS2961688::444Y97, 178797,	N.A.	*LRS=34.7(N.S.) Chr11@42.185501(rs3693664)	*N.S.
1428203_at	M430	Gabrb2	Far dist 3' UTR	Chr11@42.445575Mb	+	12.1421	0.1152	1.5305		0.291473	N.S.	N.S.
1436957_at	M430	Gabra3	dist 3' UTR	ChrX@69.679957Mb	-	8.60385	0.245199	2.30218		0.267869	N.S.	N.S.
