# Supplementary material for: Complex Control of GABA(A) Receptor Subunit mRNA Expression: Variation, Covariation, and Genetic Regulation
Source: PLoS One. 2012 Apr 10;7(4):e34586. doi: 10.1371/journal.pone.0034586 (PMC3323555; doi:10.1371/journal.pone.0034586)
Supplement: Table S5 — Probe set correlations in the whole brain and cerebellum. (XLSX) [file pone.0034586.s012.xlsx]

## Sheet: Table S5
Table S5. Probe set correlations in the whole brain and cerebellum.
GN123 Whole Brain Correlation (N=32) Pearson\Spearman	1421280_at::Gabra1(PC1)::last exon and proximal 3' UTR::WB	1421281_at::Gabra1(PC1)::mid proximal 3' UTR::WB	1436889_at::Gabra1(PC1)::distal 3' UTR::WB	1455766_at::Gabra1(PC1)::distal 3' UTR::WB	1450319_at::Gabrb2(PC1)::last exon and proximal 3' UTR::WB	1429685_at::Gabrb2(PC1)::distal 3' UTR::WB	1428204_at::Gabrb2(PC1)::distal 3' UTR::WB	1428205_x_at::Gabrb2(PC1)::distal 3' UTR::WB	1428203_at::Gabrb2::far distal 3' UTR::WB	1418177_at::Gabrg2::exons 8 and 10 and proximal 3' UTR::WB	1437147_at::Gabrg2::mid distal 3' UTR::WB	1446805_at::Gabra2::intron 3 or alternative 5' UTR::WB	1421738_at::Gabra2::last exon and proximal 3' UTR::WB	1443865_at::Gabra2::mid distal 3' UTR::WB	1455444_at::Gabra2::far distal 3' UTR::WB	1421263_at::Gabra3::last two exons::WB	1436957_at::Gabra3::distal 3' UTR::WB	1429330_at::Gabra4::last exon and proximal 3' UTR::WB	1433707_at::Gabra4::distal 3' UTR::WB	1433602_at::Gabra5::distal 3' UTR::WB	1451706_a_at::Gabra6::last three exons::WB	1417121_at::Gabra6::mid and distal 3' UTR::WB	1419719_at::Gabrb1::last exon and 3' UTR::WB	1435095_at::Gabrb1::far distal 3' UTR::WB	1421189_at::Gabrb3::last two exons and proximal 3' UTR::WB	1435021_at::Gabrb3(PC1)::far 3' UTR::WB	1421190_at::Gabrb3(PC1)::far 3' UTR::WB	1460408_at::Gabrg1::mid distal 3' UTR::WB	1445846_at::Gabrg3(PC1)::far 3' UTR::WB	1449980_a_at::Gabrd::last exon and proximal 3' UTR::WB
1421280_at::Gabra1(PC1)::last exon and proximal 3' UTR::WB	1	0.934	0.338	0.383	0.76	0.205	0.126	0.264	-0.11	0.848	0.008	-0.246	-0.021	0.264	-0.511	0.534	-0.48	-0.4	-0.129	0.154	0.122	-0.515	0.018	-0.063	0.787	0.155	0.415	-0.476	0.288	-0.058
1421281_at::Gabra1(PC1)::mid proximal 3' UTR::WB	0.928	1	0.584	0.456	0.61	0.393	0.377	0.49	-0.215	0.695	0.205	-0.062	-0.058	0.22	-0.335	0.352	-0.398	-0.137	-0.003	0.214	0.124	-0.465	0.034	0.024	0.644	0.309	0.395	-0.389	0.196	0.081
1436889_at::Gabra1(PC1)::distal 3' UTR::WB	0.333	0.56	1	0.242	-0.135	0.703	0.755	0.788	-0.504	-0.113	0.815	0.099	-0.296	-0.17	0.188	-0.174	0.112	0.463	0.236	0.182	-0.228	-0.321	-0.28	0.152	-0.107	0.195	-0.053	-0.16	0.102	0.367
1455766_at::Gabra1(PC1)::distal 3' UTR::WB	0.353	0.431	0.235	1	0.251	0.442	0.279	0.288	0.1	0.31	-0.139	0.06	0.049	0.266	-0.073	-0.242	-0.478	0.054	0.323	0.387	0.2	0.178	0.239	-0.21	0.24	0.679	0.321	0.107	-0.258	0.269
1450319_at::Gabrb2(PC1)::last exon and proximal 3' UTR::WB	0.798	0.638	-0.066	0.293	1	-0.015	-0.282	-0.208	0.112	0.872	-0.301	-0.23	0.077	0.351	-0.558	0.665	-0.611	-0.438	-0.194	0.197	0.323	-0.332	0.23	-0.109	0.878	0.127	0.543	-0.341	0.109	-0.262
1429685_at::Gabrb2(PC1)::distal 3' UTR::WB	0.241	0.435	0.702	0.503	0.073	1	0.643	0.667	-0.346	-0.055	0.458	0.351	-0.255	-0.225	0.12	-0.413	-0.144	0.452	0.081	0.191	-0.04	-0.085	0.091	0.145	-0.12	0.422	0.065	0.029	-0.155	0.344
1428204_at::Gabrb2(PC1)::distal 3' UTR::WB	0.152	0.405	0.756	0.333	-0.151	0.8	1	0.966	-0.469	-0.274	0.579	0.214	-0.203	-0.353	0.28	-0.412	0.223	0.648	0.213	0.12	-0.282	-0.249	-0.243	0.112	-0.196	0.346	0.006	-0.157	0.033	0.495
1428205_x_at::Gabrb2(PC1)::distal 3' UTR::WB	0.256	0.489	0.798	0.307	-0.106	0.772	0.976	1	-0.485	-0.128	0.549	0.202	-0.192	-0.32	0.186	-0.304	0.194	0.495	0.139	0.072	-0.28	-0.338	-0.202	0.04	-0.126	0.344	-0.026	-0.256	0.085	0.477
1428203_at::Gabrb2::far distal 3' UTR::WB	-0.138	-0.183	-0.393	0.085	-0.06	-0.389	-0.451	-0.427	1	0.214	-0.448	0.062	0.713	0.362	-0.012	0.184	-0.216	-0.189	0.243	-0.266	0.234	0.313	0.465	-0.205	0.099	-0.158	0.009	0.274	0.354	-0.593
1418177_at::Gabrg2::exons 8 and 10 and proximal 3' UTR::WB	0.867	0.705	-0.078	0.314	0.863	-0.068	-0.229	-0.127	0.177	1	-0.337	-0.173	0.179	0.181	-0.371	0.69	-0.516	-0.623	-0.174	0.121	0.291	-0.318	0.3	-0.129	0.855	0.222	0.364	-0.311	0.237	-0.291
1437147_at::Gabrg2::mid distal 3' UTR::WB	-0.127	0.076	0.621	-0.356	-0.339	0.147	0.25	0.265	-0.22	-0.361	1	-0.082	-0.123	-0.05	0.286	-0.125	0.359	0.585	0.379	0.115	-0.257	-0.221	-0.386	0.194	-0.27	-0.46	-0.234	-0.049	0.247	0.22
1446805_at::Gabra2::intron 3 or alternative 5' UTR::WB	-0.229	-0.074	0.069	0.149	-0.218	0.36	0.301	0.263	0.091	-0.147	0.005	1	-0.056	-0.238	-0.051	-0.284	0.177	0.376	0.117	-0.015	-0.001	0.164	0.519	0.302	-0.402	0.388	-0.136	0.458	-0.322	-0.174
1421738_at::Gabra2::last exon and proximal 3' UTR::WB	-0.017	-0.05	-0.262	0.012	0.129	-0.243	-0.247	-0.234	0.663	0.164	-0.262	-0.096	1	0.743	0.584	0.136	-0.176	-0.11	0.134	-0.413	0.061	0.052	0.38	-0.392	0.157	-0.174	-0.002	0.083	0.497	-0.394
1443865_at::Gabra2::mid distal 3' UTR::WB	0.105	0.067	-0.13	0.076	0.185	-0.151	-0.241	-0.229	0.255	0.398	-0.217	-0.345	0.591	1	0.777	0.304	-0.474	-0.273	0.175	-0.073	0.412	0.195	0.059	-0.434	0.274	-0.133	0.221	-0.126	0.256	0.019
1455444_at::Gabra2::far distal 3' UTR::WB	-0.378	-0.307	0.014	-0.221	-0.361	-0.084	-0.072	-0.085	0.199	-0.61	0.329	0.101	0.229	0.187	1	-0.471	0.147	0.639	0.331	-0.294	-0.08	0.379	-0.323	-0.205	-0.251	-0.355	-0.025	0.06	0.047	0.398
1421263_at::Gabra3::last two exons::WB	0.513	0.35	-0.156	-0.257	0.582	-0.446	-0.399	-0.302	0.097	0.649	0.03	-0.328	0.045	-0.044	-0.37	1	0.031	-0.511	-0.158	-0.004	0.214	-0.32	-0.047	-0.146	0.599	-0.322	0.021	-0.18	0.463	-0.377
1436957_at::Gabra3::distal 3' UTR::WB	-0.595	-0.473	0.016	-0.495	-0.638	-0.255	0.034	0.037	0.102	-0.536	0.48	0.195	-0.035	-0.334	0.088	-0.107	1	0.182	-0.001	-0.167	-0.379	-0.063	-0.261	0.283	-0.62	-0.373	-0.565	0.381	0.057	-0.038
1429330_at::Gabra4::last exon and proximal 3' UTR::WB	-0.363	-0.112	0.473	0.028	-0.434	0.532	0.656	0.541	-0.25	-0.604	0.431	0.379	-0.134	-0.104	0.299	-0.488	0.244	1	0.369	0.145	-0.197	0.123	-0.152	0.128	-0.434	0.105	0.015	0.091	-0.035	0.345
1433707_at::Gabra4::distal 3' UTR::WB	-0.093	0.101	0.384	0.206	-0.22	0.095	0.162	0.143	0.264	-0.131	0.51	0.087	0.116	0.048	0.163	-0.071	0.222	0.471	1	0.135	-0.051	0.18	0.067	-0.068	-0.02	0.054	0.096	0.293	0.058	0.028
1433602_at::Gabra5::distal 3' UTR::WB	0.135	0.18	0.184	0.363	0.25	0.261	0.129	0.036	-0.405	0.075	0.056	-0.002	-0.38	-0.183	-0.346	-0.071	0	0.047	0.177	1	-0.048	-0.1	0.054	0.096	0.101	0.421	0.066	0.031	-0.312	0.139
1451706_a_at::Gabra6::last three exons::WB	0.251	0.254	-0.111	0.239	0.302	-0.028	-0.185	-0.202	0.116	0.276	-0.168	-0.046	0.037	0.275	-0.016	0.16	-0.33	-0.159	-0.057	-0.008	1	0.679	-0.103	-0.105	0.294	0.081	0.258	-0.008	-0.12	0.198
1417121_at::Gabra6::mid and distal 3' UTR::WB	-0.385	-0.299	-0.189	0.212	-0.303	-0.028	-0.169	-0.243	0.245	-0.334	-0.111	0.135	-0.02	0.159	0.246	-0.369	-0.031	0.171	0.16	-0.078	0.609	1	-0.094	-0.004	-0.276	0.091	0.071	0.354	-0.312	0.247
1419719_at::Gabrb1::last exon and 3' UTR::WB	0.009	0.012	-0.264	0.328	0.172	0.039	-0.149	-0.154	0.576	0.291	-0.334	0.493	0.495	0.083	-0.084	-0.068	-0.076	-0.228	0.115	-0.041	-0.012	-0.058	1	0.103	0.047	0.377	-0.04	0.377	-0.196	-0.554
1435095_at::Gabrb1::far distal 3' UTR::WB	-0.023	0.083	0.173	0.044	-0.168	0.255	0.199	0.153	-0.183	-0.103	0.135	0.329	-0.384	-0.435	-0.321	-0.145	0.169	0.152	0.082	0.137	-0.175	-0.15	0.077	1	-0.094	0.278	0.166	0.355	-0.298	-0.238
1421189_at::Gabrb3::last two exons and proximal 3' UTR::WB	0.79	0.636	-0.082	0.238	0.857	-0.11	-0.189	-0.145	0.044	0.829	-0.251	-0.388	0.096	0.438	-0.436	0.641	-0.591	-0.42	-0.038	0.103	0.25	-0.374	0.053	-0.06	1	0.124	0.679	-0.453	0.19	-0.166
1435021_at::Gabrb3(PC1)::far 3' UTR::WB	0.28	0.369	0.177	0.859	0.189	0.556	0.445	0.393	-0.1	0.182	-0.168	0.465	-0.22	-0.152	-0.159	-0.243	-0.08	0.142	0.069	0.496	-0.041	-0.02	0.356	0.154	0.037	1	0.258	0.261	-0.506	0.19
1421190_at::Gabrb3(PC1)::far 3' UTR::WB	0.369	0.33	-0.074	0.265	0.439	0.107	0.058	0.01	-0.105	0.414	-0.121	-0.173	-0.047	0.352	-0.059	0.158	-0.564	0.015	0.282	0.127	0.28	-0.053	0.022	0.123	0.738	0.098	1	-0.307	-0.143	0.129
1460408_at::Gabrg1::mid distal 3' UTR::WB	-0.473	-0.357	-0.14	-0.026	-0.452	-0.101	-0.219	-0.272	0.372	-0.342	0.239	0.375	0.129	-0.024	0.179	-0.323	0.184	0.15	0.147	-0.082	0.018	0.397	0.415	0.354	-0.447	-0.006	-0.318	1	-0.301	-0.319
1445846_at::Gabrg3(PC1)::far 3' UTR::WB	0.162	0.158	0.204	-0.269	-0.022	-0.202	0.002	0.095	0.383	0.144	0.412	-0.314	0.475	0.221	0.26	0.37	0.318	0.009	0.213	-0.361	-0.103	-0.274	-0.083	-0.34	0.087	-0.495	-0.278	-0.088	1	-0.252
1449980_a_at::Gabrd::last exon and proximal 3' UTR::WB	0.1	0.16	0.347	0.311	-0.05	0.475	0.513	0.51	-0.566	-0.169	-0.074	-0.116	-0.403	0.058	0.09	-0.34	-0.321	0.321	-0.146	0.119	0.041	0.197	-0.557	-0.193	-0.057	0.296	0.211	-0.438	-0.228	1
GN56 Cerebellum Correlation (N=48) Pearson\Spearman	1421280_at_A::Gabra1(PC1)::last exon and proximal 3' UTR::CB	1421281_at_A::Gabra1(PC1)::mid proximal 3' UTR::CB	1436889_at_A::Gabra1(PC1)::distal 3' UTR::CB	1455766_at_B::Gabra1(PC1)::distal 3' UTR::CB	1450319_at_A::Gabrb2(PC1)::last exon and proximal 3' UTR::CB	1429685_at_B::Gabrb2(PC1)::distal 3' UTR::CB	1428204_at_B::Gabrb2(PC1)::distal 3' UTR::CB	1428205_x_at_B::Gabrb2(PC1)::distal 3' UTR::CB	1428203_at_B::Gabrb2::far distal 3' UTR::CB	1418177_at_A::Gabrg2::exons 8 and 10 and proximal 3' UTR::CB	1437147_at_B::Gabrg2::mid distal 3' UTR::CB	1421738_at_A::Gabra2::last exon and proximal 3' UTR::CB	1443865_at_B::Gabra2::mid distal 3' UTR::CB	1417121_at_A::Gabra6::mid and distal 3' UTR::CB	1451706_a_at_A::Gabra6::last three exons::CB	1419719_at_A::Gabrb1::last exon and 3' UTR::CB	1435095_at_B::Gabrb1::far distal 3' UTR::CB	1421189_at_A::Gabrb3::last two exons and proximal 3' UTR::CB	1435021_at_B::Gabrb3(PC1)::far 3' UTR::CB	1421190_at_A::Gabrb3(PC1)::far 3' UTR::CB	1449980_a_at_A::Gabrd::last exon and proximal 3' UTR::CB	1457763_at_B::Gabrd::antisense in intron 1 and exon 1::CB
1421280_at_A::Gabra1(PC1)::last exon and proximal 3' UTR::CB	1	0.906	0.701	0.109	0.576	0.675	0.63	0.668	0.039	0.744	0.63	-0.134	-0.019	-0.468	-0.045	0.145	0.012	0.361	0.319	0.135	0.044	-0.05
1421281_at_A::Gabra1(PC1)::mid proximal 3' UTR::CB	0.884	1	0.814	0.164	0.46	0.775	0.693	0.766	0.025	0.59	0.633	-0.092	0.018	-0.458	-0.061	0.096	-0.059	0.229	0.406	0.142	0.218	-0.042
1436889_at_A::Gabra1(PC1)::distal 3' UTR::CB	0.712	0.85	1	0.286	0.33	0.818	0.681	0.754	-0.063	0.411	0.718	-0.167	-0.06	-0.567	-0.207	-0.172	-0.133	-0.064	0.399	-0.077	0.145	-0.054
1455766_at_B::Gabra1(PC1)::distal 3' UTR::CB	0.13	0.167	0.196	1	-0.23	0.209	0.114	0.193	0.761	-0.13	0.217	-0.361	0.063	-0.162	-0.436	-0.236	0.053	-0.328	0.588	0.029	0.186	-0.194
1450319_at_A::Gabrb2(PC1)::last exon and proximal 3' UTR::CB	0.551	0.427	0.291	-0.366	1	0.46	0.421	0.452	-0.148	0.639	0.294	0.075	-0.06	-0.245	0.144	0.205	-0.058	0.56	-0.035	-0.119	-0.149	0.1
1429685_at_B::Gabrb2(PC1)::distal 3' UTR::CB	0.669	0.746	0.807	0.271	0.435	1	0.798	0.867	0.092	0.472	0.798	-0.141	-0.002	-0.609	-0.179	-0.046	-0.108	-0.096	0.513	-0.184	0.036	-0.075
1428204_at_B::Gabrb2(PC1)::distal 3' UTR::CB	0.654	0.721	0.67	0.21	0.361	0.817	1	0.924	0.171	0.595	0.708	0.009	0.044	-0.321	0.128	0.101	-0.057	0.075	0.549	-0.106	-0.086	-0.265
1428205_x_at_B::Gabrb2(PC1)::distal 3' UTR::CB	0.719	0.791	0.73	0.219	0.433	0.88	0.928	1	0.226	0.573	0.745	-0.102	-0.033	-0.464	0.011	0.025	-0.087	0.047	0.531	-0.171	-0.08	-0.19
1428203_at_B::Gabrb2::far distal 3' UTR::CB	0.021	0.037	0.006	0.747	-0.21	0.189	0.251	0.272	1	0.017	0.095	-0.313	0.058	0.093	-0.132	-0.047	0.111	-0.157	0.571	0.001	0.04	-0.253
1418177_at_A::Gabrg2::exons 8 and 10 and proximal 3' UTR::CB	0.73	0.65	0.415	-0.173	0.552	0.473	0.582	0.607	0.021	1	0.484	0.04	-0.033	-0.343	0.142	0.217	0.027	0.442	0.144	-0.001	-0.283	-0.15
1437147_at_B::Gabrg2::mid distal 3' UTR::CB	0.605	0.593	0.722	0.313	0.22	0.771	0.71	0.739	0.191	0.527	1	-0.288	-0.132	-0.677	-0.274	-0.105	0.015	-0.254	0.39	-0.162	-0.181	-0.219
1421738_at_A::Gabra2::last exon and proximal 3' UTR::CB	-0.13	-0.045	-0.201	-0.32	0.093	-0.153	-0.021	-0.074	-0.298	-0.032	-0.289	1	0.734	0.287	0.383	0.514	0.248	0.252	-0.142	0.161	-0.01	0.12
1443865_at_B::Gabra2::mid distal 3' UTR::CB	-0.085	0.001	-0.122	0.106	-0.173	-0.06	-0.022	-0.044	0	-0.013	-0.123	0.624	1	0.091	-0.004	0.468	0.311	-0.037	0.132	0.09	0.014	-0.007
1417121_at_A::Gabra6::mid and distal 3' UTR::CB	-0.456	-0.401	-0.539	-0.211	-0.18	-0.52	-0.257	-0.383	0.048	-0.26	-0.627	0.262	0.047	1	0.573	0.12	0.043	0.086	-0.096	0.3	0.459	0.083
1451706_a_at_A::Gabra6::last three exons::CB	-0.002	0.021	-0.224	-0.407	0.159	-0.143	0.164	0.089	-0.078	0.243	-0.233	0.315	-0.009	0.656	1	0.238	0.007	0.384	-0.088	0.306	0.206	-0.062
1419719_at_A::Gabrb1::last exon and 3' UTR::CB	0.159	0.126	-0.196	-0.236	0.254	-0.043	0.114	0.085	-0.081	0.231	-0.117	0.572	0.403	0.213	0.262	1	0.733	0.267	0.003	0.231	0.039	0.064
1435095_at_B::Gabrb1::far distal 3' UTR::CB	0.063	0.044	-0.1	0.124	-0.05	-0.076	0.023	0.028	0.127	0.068	0.066	0.324	0.351	0.166	0.022	0.756	1	-0.042	0.156	0.266	0.062	0.017
1421189_at_A::Gabrb3::last two exons and proximal 3' UTR::CB	0.287	0.18	-0.164	-0.416	0.536	-0.172	0.034	0.041	-0.195	0.466	-0.165	0.224	0.001	0.055	0.411	0.204	-0.123	1	-0.371	0.265	-0.151	-0.012
1435021_at_B::Gabrb3(PC1)::far 3' UTR::CB	0.318	0.42	0.397	0.653	-0.145	0.54	0.571	0.535	0.601	0.14	0.354	-0.131	0.185	-0.054	-0.112	0.012	0.102	-0.312	1	-0.04	0.217	-0.153
1421190_at_A::Gabrb3(PC1)::far 3' UTR::CB	0.11	0.142	-0.117	0.041	-0.09	-0.171	-0.095	-0.108	0.038	-0.102	-0.141	0.169	0.112	0.329	0.309	0.297	0.25	0.286	-0.077	1	0.389	-0.055
1449980_a_at_A::Gabrd::last exon and proximal 3' UTR::CB	0.022	0.17	0.11	0.24	-0.092	0.066	0.005	-0.024	0.115	-0.274	-0.184	-0.052	-0.056	0.429	0.162	-0.015	0.016	-0.149	0.29	0.406	1	0.161
1457763_at_B::Gabrd::antisense in intron 1 and exon 1::CB	0	-0.007	-0.123	-0.246	0.132	-0.107	-0.265	-0.164	-0.276	0.018	-0.321	0.142	0.108	0.023	-0.078	0.136	-0.001	0.121	-0.17	0.023	0.143	1
