# Supplementary material for: Complex Control of GABA(A) Receptor Subunit mRNA Expression: Variation, Covariation, and Genetic Regulation
Source: PLoS One. 2012 Apr 10;7(4):e34586. doi: 10.1371/journal.pone.0034586 (PMC3323555; doi:10.1371/journal.pone.0034586)
Supplement: Table S6 — Phenotypes mapping to middle and distal Chr 5 QTLs. (XLSX) [file pone.0034586.s013.xlsx]

## Sheet: Table S6
Table S6. Phenotypes mapping to middle and distal Chr 5 QTLs.
GN ID	Phenotype	Authors	Year	Pubmed ID	Number of BXD Strains	LRS	Mb
11487	Cocaine response (2 x 10 mg/kg ip), locomotion in an open field from 30-45 min after second injection in an activity chamber for males [cm]	Philip VM, Ansah TA, Blaha CD, Cook MN, Hamre KM, Lariviere WR, Matthews DB, Mittleman G, Goldowitz D, Chesler EJ	2010	19958391	63	10.8	113.832
11634	Saline control response, locomotor activity after second injection for females (control for MDMA response experiment) [cm/test period]	Philip VM, Ansah TA, Blaha CD, Cook MN, Hamre KM, Lariviere WR, Matthews DB, Mittleman G, Goldowitz D, Chesler EJ	2010	19958391	13	31.5	117.112
13352	Central nervous system, behavior: Acoustic startle response for males, 70 db white noise pulse, average of 10 trials, 40 ms pulse duration, 75 dB background noise, Med Associates startle chamber [force]	Loos M, Staal J, Pattij T, Posthuma D, Neuro-Bsik Mouse Phenomics consortium, Smit AB, Spijker S	2011		35	17.8	117.112
12975	Hippocampus dentate gyrus cells positive for Doublecortin immunohistochemistry [Number of cells]	Julia Krebs, Gerd Kempermann	2011		27	8.7	118.33
10317	Cocaine open field activity-total distance 45 mg/kg cocaine (difference from saline)-females	Jones BC, Tarantino LM, Rodriguez LA, Reed CL, McClearn GE, Plomin R, Erwin VG	1999	10591541	21	10	119.758
10318	Cocaine open field activity-total distance 45 mg/kg cocaine (difference from saline)-males and females	Jones BC, Tarantino LM, Rodriguez LA, Reed CL, McClearn GE, Plomin R, Erwin VG	1999	10591541	23	12.7	119.758
10325	Cocaine response, open field behavior, total distance area under curve (45 mg/kg ip) with saline covariate [cm]	Jones BC, Tarantino LM, Rodriguez LA, Reed CL, McClearn GE, Plomin R, Erwin VG	1999	10591541	23	14.3	119.758
10908	Anxiety assay, percentage of time in open arms of an elevated plus maze [%]	Yang RJ, Mozhui K, Karlsson RM, Cameron HA, Williams RW, Holmes A.	2008	18185497	15	16.6	119.758
12413	Anxiety assay, saline treated [0.18 ml/kg i.p.] (NOS group), activity in closed quadrants using an elevated zero maze in 60 to 120-day-old males only during last 5 min [beam breaks/sec]	Melloni Cook, Lu Lu, Rob Williams	2009		69	11.3	120.494
10954	Cancer: Hepatocellular carcinoma tumor multiplicity in liver of males after infection with 0.01 ml/g body wt N,N-diethylnitrosamine [n]	Lee GH, Bennett LM, Carabeo RA, Drinkwater NR	1995	7705639	22	9.7	123.739
12406	Anxiety assay, saline treated [0.18 ml/kg i.p.] (NOS group), time in open quadrants using an elevated zero maze in 60 to 120-day-old males only during first 5 min [percentage of time]	Melloni Cook, Lu Lu, Rob Williams	2009		69	10.7	123.739
12408	Anxiety assay, saline treated [0.18 ml/kg i.p.] (NOS group), time in open quadrants using an elevated zero maze in 60 to 120-day-old males only during 10 min [percentage of time]	Melloni Cook, Lu Lu, Rob Williams	2009		69	12.8	123.739
12416	Anxiety assay, saline treated [0.18 ml/kg i.p.] (NOS group), time in open quadrants using an elevated zero maze in 60 to 120-day-old males and females during first 5 min [percentage of time]	Melloni Cook, Lu Lu, Rob Williams	2009		71	8	123.739
12418	Anxiety assay, saline treated [0.18 ml/kg i.p.] (NOS group), time in open quadrants using an elevated zero maze in 60 to 120-day-old males and females during 10 min [percentage of time]	Melloni Cook, Lu Lu, Rob Williams	2009		71	10.4	123.739
13539	Central nervous system, behavior: Passive avoidance, latency to enter dark on day 3 in 8-week-old F1 hybrids between male BXD strains and C57BL/6J-R6/2 Huntington model, CORRECTED R6/2 cases only [sec]	Paylor R and colleagues	2011		14	9.5	126.623
12463	Anxiety assay, restraint stress [15 min] + saline treated [.018 ml/kg i.p.] (RSS group), activity in closed quadrants using an elevated zero maze in 60 to 120-day-old females only during last 5 min [beam breaks/sec]	Melloni Cook, Lu Lu, Rob Williams	2009		64	11.9	127.04
12577	Ethanol response, consumption using a two-bottle choice, 2 hour access (g/kg/2h), third week average, data log transformed [log ml]	Lopez, Williams and Becker	2010		42	11.9	127.04
12417	Anxiety assay, saline treated [0.18 ml/kg i.p.] (NOS group), time in open quadrants using an elevated zero maze in 60 to 120-day-old males and females during last 5 min [percentage of time]	Melloni Cook, Lu Lu, Rob Williams	2009		71	9.7	127.384
12407	Anxiety assay, saline treated [0.18 ml/kg i.p.] (NOS group), time in open quadrants using an elevated zero maze in 60 to 120-day-old males only during last 5 min [percentage of time]	Melloni Cook, Lu Lu, Rob Williams	2009		69	11.5	128.048
10489	Cocaine response (40 mg/kg ip), difference in locomotion using Accuscan activity monitor between day 3 (first cocaine treatment) and day 2 (saline ip baseline) [cm/15 min]	Phillips TJ, Huson MG, McKinnon CS	1998	9526019	25	16	130.849
10100	Locomotion from 1-5 min after a single saline ip injection of saline vehicle for the experimental group on trial 1 [activity counts per min]	Cunningham CL	1995	7480533	20	11.5	133.539
10173	Climbing scores after 16 mg/kg i.p. methamphetamine injection [quadrant crossings/min]	Grisel JE, Belknap JK, O'Toole LA, Helms ML, Wenger CD, Crabbe JC	1997	8987796	24	15.2	133.539
10569	Locomotor activity after 0.25 mg/kg of paraoxon in first 15 min of 30 min activity test [activity counts/min]	Risinger FO, Quick E, Belknap JK	2000	11106859	22	16.5	133.539
10855	Infectious disease, immune function: Chlamydia psittaci (6BC) infection response (10^4 IFU ip), weight loss ratio at 11 days compared to baseline in 2-4 month males [ratio]	Miyairi I, Tatireddigari VR, Mahdi OS, Rose LA, Belland RJ, Lu L, Williams RW, Byrne GI	2007	17641048	19	21	136.726
11263	Endocrinology, neuroendocrine system, morphology: Adrenal medulla width for males [um]	Di Curzio D and Goldowitz D	2011	21347846	62	16.9	141.863
11015	Anxiety assay, open field behavior, duration in center of field [sec]	Brigman JL, Mathur P, Lu L, Williams RW, Holmes A	2009	18830130	23	9.1	142.54
