# Supplementary material for: Complex Control of GABA(A) Receptor Subunit mRNA Expression: Variation, Covariation, and Genetic Regulation
Source: PLoS One. 2012 Apr 10;7(4):e34586. doi: 10.1371/journal.pone.0034586 (PMC3323555; doi:10.1371/journal.pone.0034586)
Supplement: Table S9 — Summary of Gabra1, Gabrb2, and Gabrg2 exon and distal 3′ UTR probe set correlates in the hippocampus. (XLSX) [file pone.0034586.s016.xlsx]

## Sheet: Table S9
Table S9. Summary of Gabra1, Gabrb2, and Gabrg2 exon and distal 3' UTR probe set correlates in the hippocampus.
Record	ID	Symbol	Description	Location(Chr:Mb)	Mean Expr	Max LRS	Max LRS Location (Chr:Mb)	Pearson r	N Cases	p-value	"Exon" Term Count	"Proximal" Term Count	"Middle" Term Count	"Distal" Term Count	"UTR" Term Count		Record	ID	Symbol	Description	Location(Chr:Mb)	Mean Expr	Max LRS	Max LRS Location (Chr:Mb)	Pearson r	N Cases	p-value	"Exon" Term Count	"Proximal" Term Count	"Middle" Term Count	"Distal" Term Count	"UTR" Term Count
1	1421280_at	Gabra1	gamma-aminobutyric acid (GABA-A) receptor, subunit alpha 1; last exon and proximal 3' UTR (best performance, overlaps rs29459094, rs28224563)	Chr11: 41.946779	11.453	38.5	Chr11: 42.631876	0.965	71	0	1	1			1		1	1436889_at	Gabra1	gamma-aminobutyric acid (GABA-A) receptor, subunit alpha 1; distal 3' UTR	Chr11: 41.945172	12.741	124.2	Chr11: 42.185501	0.901	71	0				1	1
2	1421281_at	Gabra1	gamma-aminobutyric acid (GABA-A) receptor, subunit alpha 1; mid proximal 3' UTR (overlaps rs29420426, rs28224565)	Chr11: 41.946133	12.055	93.1	Chr11: 42.631876	0.838	71	0		1	1		1		2	1429685_at	Gabrb2	gamma-aminobutyric acid (GABA-A) receptor, subunit beta 2; distal 3' UTR (long 3' UTR isoform)	Chr11: 42.443637	11.268	82.8	Chr11: 42.185501	0.754	71	6.66e-16				1	1
3	1419030_at	Ero1l	ERO1-like (oxidative ER protein folding, endoplasmic oxidoreductin-1-like protein); distal 3' UTR	Chr14: 45.904128	9.259	15.2	Chr1: 35.595389	0.799	71	0				1	1		3	1421281_at	Gabra1	gamma-aminobutyric acid (GABA-A) receptor, subunit alpha 1; mid proximal 3' UTR (overlaps rs29420426, rs28224565)	Chr11: 41.946133	12.055	93.1	Chr11: 42.631876	0.752	71	8.88e-16		1	1		1
4	1425929_a_at	Rnf14	ring finger protein 14; last three exons and proximal 3' UTR	Chr18: 38.472907	11.306	20.5	Chr5: 138.337847	0.782	71	0	1	1			1		4	1424105_a_at	Pttg1	pituitary tumor-transforming 1; exons 2 and 3 (test Mendelian 11.43)	Chr11: 43.236466	8.388	231.1	Chr11: 42.844126	0.715	71	1.37e-13	1
5	1421448_at	Garnl1	GTPase activating RANGAP domain-like 1; exons 32, 33, 34, and 35	Chr12: 56.741593	10.259	16.1	Chr5: 133.538653	0.757	71	2.22e-16	1						5	1432393_a_at	Icf45	interphase cyctoplasmic foci protein 45; exons 3 and 4	Chr11: 45.765047	7.338	148.3	Chr11: 44.552712	-0.696	71	1.39e-12	1
6	1416794_at	Arl6ip2	ADP-ribosylation factor-like 6 interacting protein 2; exon 9	Chr17: 80.252004	8.891	14.3	Chr1: 157.588921	0.754	71	4.44e-16	1						6	1437147_at	Gabrg2	gamma-aminobutyric acid (GABA-A) receptor, subunit gamma 2; mid distal 3' UTR	Chr11: 41.724032	10.07	38.2	Chr11: 42.185501	0.692	71	2.28e-12			1	1	1
7	1457936_at	Mapk8	mitogen activated protein kinase 8; far 3' UTR (transQTL to chr 4 in BXD Eye Data)	Chr14: 34.192382	9.108	14.2	Chr5: 138.337847	0.752	71	8.88e-16					1		7	1455766_at	Gabra1	gamma-aminobutyric acid (GABA-A) receptor, subunit alpha 1; distal 3' UTR (good performance)	Chr11: 41.944474	12.702	27.6	Chr11: 42.185501	0.676	71	1.24e-11				1	1
8	1454962_at	Spire1	spire 1 (actin nucleation factor); proximal to mid 3' UTR (transQTL on chr 4 in BXD Eye Data)	Chr18: 67.649822	10.646	16.2	Chr1: 25.489364	0.744	71	2.66e-15		1	1		1		8	1438390_s_at	Pttg1	pituitary tumor-transforming 1 (securin); 3' end of last exon (last 15 codons, test Mendelian 11.43)	Chr11: 43.233827	11.537	201.1	Chr11: 42.844126	0.662	71	5.1e-11	1
9	1425650_at	Tle4	transducin-like enhancer of split 4, homolog of Drosophila E(spl); last four exons	Chr19: 14.526161	8.333	14.2	Chr5: 133.538653	0.743	71	3.11e-15	1						9	1440393_at	Odz2	odd Oz/ten-m homolog 2; intron (from EST BE824906)	Chr11: 36.362858	8.133	91.6	Chr11: 35.986496	-0.634	71	7.25e-10
10	1439214_a_at	Api5	apoptosis inhibitor 5; proximal 3' UTR	Chr2: 94.253669	8.388	14.9	Chr1: 162.215218	0.742	71	3.77e-15		1			1		10	1419620_at	Pttg1	pituitary tumor-transforming 1; mid 3' UTR	Chr11: 43.233897	7.216	138.4	Chr11: 42.844126	0.62	71	2.33e-09			1		1
11	1448309_at	Ap3m1	adaptor-related protein complex 3, mu 1 subunit; last four exons and proximal 3' UTR	Chr14: 21.855895	9.123	14.1	Chr1: 29.231425	0.741	71	4.22e-15	1	1			1		11	1428205_x_at	Gabrb2	gamma-aminobutyric acid (GABA-A) receptor, subunit beta 2; distal 3' UTR (long 3' UTR isoform)	Chr11: 42.444613	11.819	61.7	Chr11: 35.986496	0.597	71	1.38e-08				1	1
12	1450846_at	Bzw1	basic leucine zipper and W2 domains 1; exons 3, 5, and 7	Chr1: 58.455883	10.558	17.2	Chr5: 138.337847	0.739	71	5.11e-15	1						12	1428204_at	Gabrb2	gamma-aminobutyric acid (GABA-A) receptor, subunit beta 2; distal 3' UTR (long 3' UTR isoform)	Chr11: 42.444613	12.048	57	Chr11: 35.986496	0.581	71	4.33e-08				1	1
13	1420857_at	Lancl2	LanC (bacterial lantibiotic synthetase component C)-like 2; mid and distal half of 3' UTR	Chr6: 57.687959	9.456	13.8	Chr9: 40.929719	0.735	71	9.99e-15			1	1	1		13	1418402_at	Adam19	a disintegrin and metalloproteinase domain 19 (meltrin beta, dendritic cell marker); distal 3' UTR	Chr11: 45.960270	8.363	38.7	Chr11: 42.844126	-0.573	71	7.67e-08				1	1
14	1424571_at	Ddx46	DEAD (Asp-Glu-Ala-Asp) box polypeptide 46; putative far 3' UTR	Chr13: 55.781189	8.61	14.2	Chr1: 165.315110	0.734	71	1.18e-14					1		14	1444351_at	Cyfip2	cytoplasmic FMR1 interacting protein 2	Chr11: 46.016262	6.312	55.7	Chr11: 44.552712	-0.573	71	7.71e-08
15	1439041_at	Slc39a10	solute carrier family 39 (zinc transporter), member 10; mid 3' UTR	Chr1: 53.450317	9.855	18.6	Chr5: 133.538653	0.73	71	1.91e-14			1		1		15	1439044_at	Zfp354c	zinc finger protein 354C	Chr11: 50.624900	9.088	30.3	Chr11: 50.558768	0.563	71	1.49e-07
16	1421095_a_at	Trpc1	transient receptor potential cation channel, subfamily C, member 1; last 3 exons	Chr9: 95.607179	7.994	12.2	Chr5: 133.538653	0.729	71	2.31e-14	1						16	1453268_at	Lsm11	U7 snRNP-specific Sm-like protein LSM11	Chr11: 45.760403	7.973	36.3	Chr11: 42.844126	-0.555	71	2.45e-07
17	1423040_at	Bzw1	basic leucine zipper and W2 domains 1; last 2 exons and proximal 3' UTR	Chr1: 58.461077	10.011	14.8	Chr1: 35.595389	0.726	71	3.13e-14	1	1			1		17	1446597_at	Fancl	RIKEN cDNA 4930563B10 gene	Chr11: 26.286240	4.619	24.1	Chr11: 22.928397	0.544	71	4.88e-07
18	1427490_at	Abcb7	ATP-binding cassette, sub-family B (MDR/TAP), member 7 (X-linked sideroblastic anemia with ataxia, mitochondrial iron homeostasis); 3' UTR	ChrX: 101.478824	7.499	15.9	Chr5: 138.337847	0.726	71	3.13e-14					1		18	1448144_at	Agxt2l2	alanine-glyoxylate aminotransferase 2-like 2; mid distal 3' UTR (antisense in Hnrpab)	Chr11: 51.414037	9.483	39.2	Chr11: 50.558768	0.532	71	9.86e-07			1	1	1
19	1419548_at	Kpna1	karyopherin (importin) alpha 1	Chr16: 36.035509	10.477	14.6	Chr12: 70.704784	0.726	71	3.4e-14							19	1421280_at	Gabra1	gamma-aminobutyric acid (GABA-A) receptor, subunit alpha 1; last exon and proximal 3' UTR (best performance, overlaps rs29459094, rs28224563)	Chr11: 41.946779	11.453	38.5	Chr11: 42.631876	0.529	71	1.19e-06	1	1			1
20	1416475_at	Ube2d2	ubiquitin-conjugating enzyme E2D 2; exons 2, 3, and 4 and proximal 3' UTR	Chr18: 35.959495	8.889	17.2	Chr1: 35.595389	0.725	71	3.53e-14	1	1			1		20	1455712_at	Hist3h2a	histone 3, H2a; 3' UTR	Chr11: 58.769327	8.291	45.1	Chr11: 58.819965	0.507	71	3.99e-06					1
21	1443957_at	Dixdc1	DIX domain containing 1; proximal 3' UTR	Chr9: 50.473424	8.448	10.6	Chr1: 36.052583	0.724	71	4.2e-14		1			1		21	1459290_at	Gm691	gene model 691, (NCBI)	Chr2: 157.767573	8.158	11.2	Chr14: 21.831603	-0.503	71	4.99e-06
22	1420856_a_at	Lancl2	LanC (bacterial lantibiotic synthetase component C)-like 2; proximal 3' UTR	Chr6: 57.687880	7.953	14	Chr9: 40.929719	0.723	71	4.62e-14		1			1		22	1457959_at	Svs6	seminal vesicle secretion 6	Chr13: 41.274008	5.071	14.9	Chr15: 90.759411	0.502	71	5.4e-06
23	1426635_at	Acbd3	acyl-Coenzyme A binding domain containing 3; last exon and proximal 3' UTR	Chr1: 182.682325	8.244	12.5	Chr5: 138.337847	0.723	71	4.84e-14	1	1			1		23	1440511_at	Psme4	proteasome (prosome, macropain) activator subunit 4	Chr11: 30.695253	7.346	30.4	Chr11: 33.538733	0.499	71	6.35e-06
24	1434181_at	Plekhc1	pleckstrin homology domain containing, family C (with FERM domain) member 1; last four exons	Chr14: 46.079534	9.651	14.4	Chr2: 77.938377	0.723	71	5.11e-14	1						24	1449215_at	Slc22a21	solute carrier family 22 (organic cation transporter), member 21	Chr11: 53.764584	5.831	29.6	Chr11: 56.329567	0.496	71	7.43e-06
25	1440228_at	Ranbp6	RAN binding protein 6; only exon	Chr19: 29.884579	9.366	19.8	Chr5: 138.337847	0.721	71	6.35e-14	1						25	1446941_at	Slk	STE20-like kinase (yeast)	Chr19: 47.691264	7.124	15.5	Chr15: 8.249029	-0.49	71	9.89e-06
26	1438361_at	2310035C23Rik	RIKEN cDNA 2310035C23 gene	Chr1: 107.616061	6.368	13.1	Chr1: 35.595389	0.72	71	7.19e-14							26	1447626_x_at	Arid3b	T rich interactive domain 3B; last exon or 3' UTR	Chr9: 57.638374	7.358	8.8	Chr19: 53.933992	-0.489	71	1.02e-05	1				1
27	1428087_at	Dnm1l	dynamin 1-like; proximal 3' UTR	Chr16: 16.313632	11.78	17.1	Chr5: 133.538653	0.717	71	1.01e-13		1			1		27	1440284_at	AI586015	expressed sequence AI586015	Chr5: 86.533181	4.735	21.8	Chr5: 90.500265	0.486	71	1.18e-05
28	1419029_at	Ero1l	ERO1-like (oxidative ER protein folding, endoplasmic oxidoreductin-1-like protein); last five exons and 3' UTR	Chr14: 45.905599	8.48	15.2	Chr16: 96.944467	0.717	71	1.07e-13	1				1		28	1421777_at	Olfr73	olfactory receptor 73; exon	Chr2: 87.874413	6.173	14	Chr5: 126.622829	-0.486	71	1.19e-05	1
29	1419644_at	Cstf2	cleavage stimulation factor, 3' pre-RNA, subunit 2, 64kDa; last three exons and proximal 3' UTR	ChrX: 130.609233	8.74	11.8	Chr5: 133.538653	0.717	71	1.1e-13	1	1			1		29	1439825_at	Dtx3l	deltex 3-like; mid 3' UTR	Chr16: 35.928270	8.053	10.9	Chr16: 88.033027	-0.473	71	2.25e-05			1		1
30	1419494_a_at	Tpd52	tumor protein D52; last exon and proximal 3' UTR	Chr3: 8.930687	10.149	13.4	Chr5: 138.337847	0.714	71	1.66e-13	1	1			1		30	1437793_at	H2-D1	ESTs, Weakly similar to RIKEN cDNA 5730493B19 [] [M.musculus]	Chr19: 36.911762	8.71	9	Chr1: 95.148080	-0.473	71	2.26e-05
31	1420971_at	Ubr1	ubiquitin protein ligase E3 component n-recognin 1; half distal 3' UTR	Chr2: 120.687411	9.042	20.7	Chr9: 40.929719	0.714	71	1.67e-13				1	1		31	1415788_at	Ublcp1	ubiquitin-like domain containing CTD phosphatase 1; mid 3' UTR	Chr11: 44.268295	10.718	16.7	Chr11: 44.227083	0.472	71	2.4e-05			1		1
32	1452638_s_at	Dnm1l	dynamin 1-like; last two exons (5 and 6) of short form message	Chr16: 16.336958	8.304	16	Chr5: 138.337847	0.713	71	1.89e-13	1						32	1423148_at	Skp1a	S-phase kinase-associated protein 1A; second and third to last exons and proximal 3' UTR	Chr11: 52.057113	12.177	76.8	Chr11: 51.824798	0.472	71	2.41e-05	1	1			1
33	1431045_at	Fam49a	family with sequence similarity 49, member A, zinc finger, highly expressed in CNS; mid 3' UTR	Chr12: 12.380409	9.514	18.5	Chr5: 138.337847	0.712	71	2.02e-13			1		1		33	1459328_at	4930429A22Rik	RIKEN cDNA 4930429A22 gene	Chr1: 88.791164	7.89	9.1	Chr1: 172.980820	-0.472	71	2.42e-05
34	1448607_at	Pbef1	pre-B-cell colony-enhancing factor 1	Chr12: 33.536246	8.135	13.3	Chr16: 89.885517	0.711	71	2.28e-13							34	1418092_s_at	Trip10	thyroid hormone receptor interactor 10	Chr17: 57.401806	8.356	11.1	Chr12: 115.166911	-0.47	71	2.62e-05
35	1423297_at	Add3	adducin 3 (gamma); proximal 3' UTR	Chr19: 53.319976	10.129	15.3	Chr5: 133.538653	0.711	71	2.4e-13		1			1		35	1415961_at	Itm2c	integral membrane protein 2C	Chr1: 87.804692	13.856	9.8	Chr14: 11.312992	-0.47	71	2.64e-05
36	1418177_at	Gabrg2	gamma-aminobutyric acid (GABA-A) receptor, subunit gamma 2; exons 8 and 10 and proximal 3' UTR (last two exons are alternatively spliced by Nova1)	Chr11: 41.725716	11.75	21.5	Chr5: 138.337847	0.71	71	2.48e-13	1	1			1		36	1437905_at	Txnl	thioredoxin-like	--	4.525	12.3	Chr12: 115.166911	0.469	71	2.71e-05
37	1455480_s_at	Ube2d3	ubiquitin-conjugating enzyme E2D 3 (UBC4/5 homolog); exons 1 through 4	Chr3: 135.102686	10.911	14.9	Chr1: 35.595389	0.708	71	3.32e-13	1						37	1445935_at	BG069821	BG069821 EST; intergenic sequence	Chr1: 145.169496	8.886	12.4	Chr12: 116.788761	-0.469	71	2.74e-05
38	1431334_a_at	4933433P14Rik	RIKEN cDNA 4933433P14 gene	Chr12: 106.923624	8.122	16.8	Chr16: 96.944467	0.708	71	3.35e-13							38	1432013_a_at	2610016C23Rik	RIKEN cDNA 2610016C23 gene	Chr10: 20.077383	7.259	8.4	Chr7: 51.794016	-0.465	71	3.26e-05
39	1450478_a_at	Ptpn12	protein tyrosine phosphatase, non-receptor type 12	Chr5: 20.494827	8.682	14.3	Chr5: 123.738718	0.707	71	3.62e-13							39	1451181_at	2410008J05Rik	RIKEN cDNA 2410008J05 gene	Chr12: 114.427163	7.836	69.3	Chr12: 114.553844	0.465	71	3.29e-05
40	1450768_at	Dlg1	discs large 1 (synapse-associated protein 97); last exon and proximal 3' UTR	Chr16: 31.871772	10.818	22.4	Chr5: 133.538653	0.706	71	4.21e-13	1	1			1		40	1449989_at	Mcpt2	mast cell protease 2; last two exons and 3' UTR	Chr14: 56.662558	7.558	12.4	Chr12: 114.553844	-0.463	71	3.6e-05	1				1
41	1428888_at	Tmem33	transmembrane protein 33	Chr5: 67.679863	7.488	14.7	Chr1: 35.595389	0.706	71	4.47e-13							41	1428632_at	1810006K21Rik	Mus musculus, Similar to chromosome 11 open reading frame 10, clone MGC:28215 IMAGE:3990436, mRNA, complete cds	Chr19: 10.278583	8.498	15.4	Chr16: 89.533119	-0.462	71	3.83e-05
42	1420607_at	Rbm18	RNA binding motif protein 18; third to last exon, last exon, and proximal 3' UTR	Chr2: 35.973160	9.789	14.8	Chr5: 138.337847	0.705	71	4.57e-13	1	1			1		42	1460456_at	2010316F05Rik	RIKEN cDNA 2010316F05 gene	Chr11: 29.412927	6.283	29	Chr11: 28.975002	0.461	71	3.89e-05
43	1451693_a_at	Fgf12	fibroblast growth factor 12; last several exons	Chr16: 28.189620	10.173	16.5	Chr16: 97.617114	0.704	71	5.2e-13	1						43	1459573_at	2310066N05Rik	RIKEN cDNA 2310066I18 gene	Chr3: 146.173788	8.44	7.9	Chr12: 29.581163	-0.46	71	4.09e-05
44	1421198_at	Itgav	integrin, alpha V (vitronectin receptor, alpha polypeptide, antigen CD51); last exon and 3' UTR	Chr2: 83.643396	7.184	17.3	Chr5: 133.538653	0.703	71	5.94e-13	1				1		44	1440569_at	Slc16a10	solute carrier family 16 (monocarboxylic acid transporters), member 10	Chr10: 39.795868	4.766	13.7	Chr15: 3.229128	0.46	71	4.21e-05
45	1452137_at	Acbd3	acyl-Coenzyme A binding domain containing 3; exons 6 and 7	Chr1: 182.675240	7.513	11.9	Chr5: 138.337847	0.701	71	7.9e-13	1						45	1431677_at	Zfp353	zinc finger protein 353	Chr11: 43.524236	7.206	23.8	Chr11: 44.227083	-0.458	71	4.45e-05
46	1421832_at	Twsg1	twisted gastrulation homolog 1; proximal to mid 3' UTR	Chr17: 66.274225	7.964	12.5	Chr1: 138.462985	0.7	71	8.27e-13		1	1		1		46	1447246_at	AK079848	AK079848 thymus EST	Chr2: 168.846213	8.423	22.2	Chr12: 115.166911	-0.458	71	4.46e-05
47	1448603_at	Srpk2	serine/arginine-rich protein specific kinase 2; last three exons and proximal 3' UTR	Chr5: 23.013124	9.758	18	Chr5: 138.337847	0.7	71	8.31e-13	1	1			1		47	1443722_at	6030419C18Rik	RIKEN cDNA 6030419C18 gene	Chr9: 58.341040	9.92	12.2	Chr12: 116.788761	-0.458	71	4.48e-05
48	1426842_at	Ythdf3	YTH domain family 3; proximal and mid 3' UTR	Chr3: 16.114439	9.383	12.4	Chr1: 25.632282	0.7	71	8.49e-13		1	1		1		48	1428196_a_at	Fam82a2	regulator of microtubule dynamics protein 3 (family with sequence similarity 82, member A2); distal 3' UTR	Chr2: 118.962765	9.743	22.9	Chr2: 118.706766	0.457	71	4.72e-05				1	1
49	1451733_at	Gcnt2	glucosaminyl (N-acetyl) transferase 2, I-branching enzyme	Chr13: 41.054541	6.374	13.5	Chr5: 139.970687	0.699	71	9.24e-13							49	1455293_at	Gm185	gene model 185, (NCBI)	Chr9: 75.304945	8.475	12.2	Chr1: 172.980820	0.456	71	4.92e-05
50	1421879_at	Mtmr1	myotubularin related protein 1; last exon and proximal 3' UTR	ChrX: 68.669901	9.351	11.4	Chr1: 25.489364	0.698	71	1.09e-12	1	1			1		50	1433024_at	4930421C12Rik	RIKEN cDNA 4930421C12 gene	Chr5: 39.834343	7.526	11.9	Chr12: 115.166911	-0.455	71	5.13e-05
51	1435075_at	Tmem106b	transmembrane protein 106B with DUF1356 domain (possible Htr2c network member); 3' UTR	Chr6: 13.036756	8.722	15.2	Chr1: 29.231425	0.697	71	1.27e-12					1		51	1446887_at	BC004728	cDNA sequence BC004728	ChrX: 51.088182	7.772	8.9	ChrX: 55.021541	-0.453	71	5.68e-05
52	1420858_at	Pkia	protein kinase inhibitor, alpha (hippocampal CA2-3 and DG expression signature); mid 3' UTR	Chr3: 7.443522	10.143	12.3	Chr6: 145.406059	0.695	71	1.54e-12			1		1		52	1455866_x_at	Txnl1	thioredoxin-like 1	Chr18: 63.823766	5.504	16.5	ChrX: 55.021541	0.451	71	6.03e-05
53	1431768_a_at	Hrmt1l3	heterogeneous nuclear ribonucleoprotein methyltransferase-like 3 (S. cerevisiae)	Chr7: 57.037310	5.888	15.6	Chr16: 96.944467	0.695	71	1.61e-12							53	1418403_at	Adam19	a disintegrin and metalloproteinase domain 19 (meltrin beta, dendritic cell marker); mid 3' UTR	Chr11: 45.959218	7.357	22.6	Chr11: 42.185501	-0.451	71	6.17e-05			1		1
54	1450385_at	Kpna3	karyopherin (importin) alpha 3; proximal 3' UTR	Chr14: 61.986036	9.766	19.8	Chr5: 138.337847	0.695	71	1.61e-12		1			1		54	1427108_at	9530068E07Rik	RIKEN cDNA 9530068E07 gene; distal 3' UTR	Chr11: 52.221652	10.285	42.5	Chr11: 51.824798	0.451	71	6.23e-05				1	1
55	1419191_at	Hipk3	homeodomain interacting protein kinase 3; last exon	Chr2: 104.270013	7.299	13.6	Chr5: 133.538653	0.694	71	1.67e-12	1						55	1434201_at	Chrdl1	chordin-like 1	ChrX: 139.731742	5.061	12.9	Chr19: 53.459278	0.451	71	6.25e-05
56	1421990_at	Syt1	synaptotagmin 1 (synaptic vesicle calcium sensor); proximal 3' UTR	Chr10: 107.937024	12.19	20.7	Chr5: 133.538653	0.692	71	2.09e-12		1			1		56	1460272_at	4930522D07Rik	RIKEN cDNA 4930522D07 gene	Chr3: 107.357023	8.68	9.6	Chr5: 115.597883	-0.451	71	6.26e-05
57	1418020_s_at	Cpd	carboxypeptidase D; 3' UTR	Chr11: 76.594159	8.552	14.6	Chr5: 132.603108	0.691	71	2.42e-12					1		57	1433093_at	2900092N22Rik	RIKEN cDNA 2900092N22 gene	Chr2: 14.595082	7.235	14.2	Chr12: 115.166911	-0.449	71	6.64e-05
58	1431677_at	Zfp353	zinc finger protein 353	Chr11: 43.524236	7.206	23.8	Chr11: 44.227083	-0.69	71	2.86e-12							58	1453479_at	1700086P04Rik	RIKEN cDNA 1700086P04 gene	Chr4: 128.727559	6.988	8.7	Chr8: 84.568954	-0.449	71	6.68e-05
59	1429249_at	Pap2d	phosphatidic acid phosphatase type 2d (plasticity related gene 5); last three exons	Chr3: 117.365440	9.013	12.1	Chr5: 133.538653	0.689	71	3.17e-12	1						59	1437514_at	B430306N03Rik	RIKEN cDNA B430306N03 gene	Chr17: 48.464296	8.018	7.4	Chr2: 65.704271	-0.448	71	7.04e-05
60	1451726_at	Mtmr6	myotubularin related protein 6; mid 3' UTR	Chr14: 60.919908	11.038	16.6	Chr5: 138.337847	0.688	71	3.47e-12			1		1		60	1442879_at	Colec12	collectin sub-family member 12	Chr7: 60.367437	4.483	18.1	Chr12: 114.553844	0.448	71	7.09e-05
61	1416162_at	Rad21	RAD21 homolog; last four exons	Chr15: 51.795601	9.531	15.2	Chr1: 35.595389	0.688	71	3.56e-12	1						61	1433889_at	Sox9	SRY-box containing gene 9; distal 3' UTR	Chr11: 112.648588	6.199	9.8	ChrX: 55.021541	0.448	71	7.09e-05				1	1
62	1429384_at	Csnk1g3	casein kinase 1, gamma 3; proximal 3' UTR	Chr18: 54.112985	8.81	12.9	Chr16: 96.944467	0.687	71	3.69e-12		1			1		62	1441939_x_at	2410003I16Rik	ES cells cDNA, RIKEN full-length enriched library, clone:2410003I16 product:unclassifiable, full insert sequence.	Chr16: 94.011231	4.5	8.3	Chr3: 10.327101	0.447	71	7.25e-05
63	1452080_a_at	Dcun1d1	defective in cullin neddylation 1, domain containing 1; mid proximal 3' UTR	Chr3: 35.793576	9.536	12.2	Chr5: 123.738718	0.685	71	4.58e-12		1	1		1		63	1440270_at	Fgf12	fibroblast growth factor 12	Chr16: 28.160249	10.175	15	Chr6: 101.797292	0.447	71	7.46e-05
64	1415882_at	Ghitm	growth hormone inducible transmembrane protein; exons 6 and 7, and proximal 3' UTR	Chr14: 37.935159	12.528	20.4	Chr5: 138.337847	0.685	71	4.59e-12	1	1			1		64	1439390_at	1300018I17Rik	RIKEN cDNA 1300018I17; distal 3' UTR	Chr8: 125.766259	4.718	16.5	Chr2: 65.704271	0.446	71	7.78e-05				1	1
65	1450105_at	Adam10	a disintegrin and metalloprotease domain 10; mid 3' UTR	Chr9: 70.626560	9.362	15.3	Chr1: 165.315110	0.684	71	5.13e-12			1		1		65	1434572_at	Hdac9	histone deacetylase 9; distal 3' UTR	Chr12: 35.056460	8.187	14.1	Chr10: 114.515889	0.445	71	8.01e-05				1	1
66	1422900_at	Mgea5	meningioma expressed antigen 5 (hyaluronidase); last 2 exons and proximal 3' UTR	Chr19: 45.826386	11.079	18.2	Chr5: 138.337847	0.683	71	5.77e-12	1	1			1		66	1415685_at	Mtif2	mitochondrial translational initiation factor 2	Chr11: 29.442428	8.924	72	Chr11: 28.975002	0.444	71	8.36e-05
67	1423961_at	Wdr26	WD repeat domain 26; putative far 3' UTR	Chr1: 183.106338	9.863	13.5	Chr5: 133.538653	0.683	71	6.03e-12					1		67	1440715_s_at	D11Ertd497e	DNA segment, Chr 11, ERATO Doi 497, expressed	Chr11: 51.790435	9.901	15.3	Chr11: 55.886002	0.443	71	8.6e-05
68	1438362_x_at	2310035C23Rik	RIKEN cDNA 2310035C23 KIAA1468 protein; central exon	Chr1: 107.616027	6.315	11.2	Chr2: 77.938377	0.683	71	6.19e-12	1						68	1445515_at	E330037G11Rik	RIKEN cDNA E330037G11 gene	Chr8: 110.101213	7.849	15	Chr2: 179.013701	-0.443	71	8.68e-05
69	1425861_x_at	Cacna2d1	calcium channel, voltage-dependent, alpha2/delta subunit 1; distal or far 3' UTR	Chr5: 15.876934	7.703	10.9	Chr5: 138.337847	0.682	71	6.34e-12				1	1		69	1419214_at	Tnfrsf11a	tumor necrosis factor receptor superfamily, member 11a	Chr1: 107.741424	7.097	14.7	Chr12: 115.166911	-0.443	71	8.82e-05
70	1434644_at	Tbl1x	transducin (beta)-like 1 X-linked	ChrX: 74.906129	7.129	16.3	Chr1: 35.595389	0.682	71	6.64e-12							70	1442963_at	Zhx3	zinc fingers and homeoboxes 3	Chr2: 160.601008	8.499	11.8	Chr3: 10.018672	-0.442	71	8.88e-05
71	1425491_at	Bmpr1a	bone morphogenetic protein receptor, type 1A	Chr14: 35.227191	8.66	16.2	Chr12: 70.704784	0.682	71	6.71e-12							71	1422598_at	Casq1	calsequestrin 1; last exon and proximal 3' UTR	Chr1: 174.140070	9.154	12	Chr12: 115.166911	-0.442	71	9.14e-05	1	1			1
72	1431744_a_at	Smap1	stromal membrane-associated protein 1; exon 8	Chr1: 23.856140	8.506	15.1	Chr3: 15.893579	0.681	71	7.79e-12	1						72	1421387_at	Kremen1	kringle containing transmembrane protein 1	Chr11: 5.094317	7.447	16.2	Chr4: 141.171040	-0.442	71	9.21e-05
73	1437102_at	Ythdf1	YTH domain family 1; exon 4 and proximal 3' UTR (transQTL on chr 4 in BXD Eye Data)	Chr2: 180.640171	9.571	13	Chr5: 138.337847	0.68	71	7.83e-12	1	1			1		73	1452200_at	Cdkn2aipnl	CDKN2A interacting protein N-terminal like; mid distal 3' UTR	Chr11: 51.790256	10.033	15.2	Chr11: 55.886002	0.441	71	9.32e-05			1	1	1
74	1452711_at	Spg3a	spastic paraplegia 3A homolog; exons 11, 12, 13, and 15	Chr12: 71.060050	10.272	19.4	Chr5: 138.337847	0.68	71	8.27e-12	1						74	1445080_at	TIF2	coactivator of nuclear receptors	Chr11: 35.721850	7.656	12.2	Chr19: 56.682123	-0.441	71	9.53e-05
75	1431252_a_at	Zfp655	zinc finger protein 655	Chr5: 146.005535	8.678	10.2	Chr4: 33.109559	0.679	71	9.5e-12							75	1454081_at	4933417J23Rik	RIKEN cDNA 4933417J23 gene	Chr13: 96.478420	6.782	14.7	Chr15: 3.927909	-0.44	71	9.66e-05
76	1428718_at	Scrn1	secernin 1; putative far 3' UTR	Chr6: 54.457063	9.796	12.5	Chr1: 35.595389	0.678	71	9.69e-12					1		76	1432278_at	4930471M09Rik	RIKEN cDNA 4930427C17 gene	Chr6: 91.380556	5.897	16.3	Chr11: 55.886002	0.44	71	9.67e-05
77	1453949_s_at	Lypla1	lysophospholipase 1; two of last three exons	Chr1: 4.829518	8.883	21.9	Chr1: 35.595389	0.678	71	1.04e-11	1						77	1427585_at	AF071754	Mus musculus DNA cytosine methyltransferase mRNA	--	4.351	12.1	Chr12: 115.166911	0.44	71	9.69e-05
78	1454663_at	Eif5	eukaryotic translation initiation factor 5; last 3 exons and proximal 3' UTR	Chr12: 112.781418	10.179	13.2	Chr1: 25.632282	0.678	71	1.06e-11	1	1			1		78	1441364_at	Gata4	GATA binding protein 4	Chr14: 63.840911	7.785	8.5	Chr10: 67.552465	-0.44	71	9.74e-05
79	1450845_a_at	Bzw1	basic leucine zipper and W2 domains 1; proximal 3' UTR	Chr1: 58.462185	10.691	16.6	Chr1: 168.913137	0.677	71	1.08e-11		1			1		79	1442140_at	Tnn	tenascin N	Chr1: 162.015511	8.037	11.8	Chr12: 116.788761	-0.44	71	9.97e-05
80	1421622_a_at	Rapgef4	Rap guanine nucleotide exchange factor (GEF) 4; exons 23, 24, 26, 28, and 29	Chr2: 72.077121	10.997	11.4	Chr4: 33.109559	0.677	71	1.09e-11	1						80	1441755_at	Mapk15	mitogen-activated protein kinase 15	Chr15: 75.829254	7.366	13.9	Chr15: 3.927909	-0.439	71	0.0001
81	1449262_s_at	Lin7c	Lin-7 type 3 (Veli3-CASK-Mint1 complex, PDZ domain, synapse and cell-cell junction associated, NMDA synaptic receptor complex chaperone); mid 3' UTR	Chr2: 109.738474	9.726	16	Chr5: 136.726447	0.676	71	1.22e-11			1		1		81	1458128_at	C430010P07Rik	RIKEN cDNA C430010P07 gene; 3' UTR of the short message	Chr1: 66.823623	9.582	55.2	Chr1: 66.762986	-0.438	71	0.00011					1
82	1450396_at	Stag2	stromal antigen 2	ChrX: 39.619325	8.572	11.6	Chr1: 35.595389	0.676	71	1.22e-11							82	1432347_at	4931428L18Rik	RIKEN cDNA 4931428L18 gene	Chr1: 31.197972	7.252	13.4	Chr10: 114.515889	-0.437	71	0.00011
83	1431030_a_at	Rnf14	ring finger protein 14; last exon and 3' UTR	Chr18: 38.459433	9.669	19.4	Chr5: 138.337847	0.676	71	1.25e-11	1				1		83	1443730_at	9130404D14Rik	RIKEN cDNA 9130404D14 gene	Chr2: 32.748448	8.586	19.5	Chr4: 154.365177	-0.437	71	0.00011
84	1450015_x_at	Sgpp1	sphingosine-1-phosphate phosphatase 1; proximal 3' UTR	Chr12: 76.816708	9.029	16	Chr12: 97.343221	0.676	71	1.32e-11		1			1		84	1457901_at	Cdc42	cell division cycle 42 homolog (S. cerevisiae)	Chr4: 136.909788	8.081	37.3	Chr4: 136.230563	-0.437	71	0.00011
85	1427255_s_at	Zfp445	zinc finger protein 445; putative far 3' UTR	Chr9: 122.759531	10.485	18.2	Chr5: 138.337847	0.675	71	1.38e-11					1		85	1419212_at	Icoslg	icos ligand	Chr10: 77.541685	7.837	13.7	Chr19: 12.404870	-0.435	71	0.00012
86	1421866_at	Nr3c1	nuclear receptor subfamily 3, group C, member 1 (glucocorticoid receptor 1, cortisol/corticosterone receptor, dexamethasone-binding receptor); last three exons and 3' UTR	Chr18: 39.573945	8.371	10.6	Chr5: 140.893042	0.675	71	1.4e-11	1				1		86	1457658_x_at	Anxa4	annexin A4	Chr6: 86.687679	5.748	38.5	Chr6: 87.099760	0.435	71	0.00012
87	1431606_a_at	Angel2	angel 2	Chr1: 192.761338	7.701	20.3	Chr16: 96.944467	0.675	71	1.42e-11							87	1453199_at	Acbd6	acyl-Coenzyme A binding domain containing 6	Chr1: 157.463009	9.062	21.4	Chr12: 116.788761	0.435	71	0.00012
88	1448014_s_at	Usp24	ubiquitin specific peptidase 24; mid 3' UTR	Chr4: 106.111832	7.596	16.3	Chr6: 145.406059	0.675	71	1.42e-11			1		1		88	1441126_at	A930012M21Rik	RIKEN cDNA A930012M21 gene	Chr1: 78.416961	7.645	14.5	Chr4: 154.876683	-0.434	71	0.00012
89	1431183_at	1700066M21Rik	RIKEN cDNA 1700066M21; last exon and 3' UTR	Chr1: 57.440373	8.225	11.4	Chr1: 35.595389	0.674	71	1.49e-11	1				1		89	1446680_at	Stag1	stromal antigen 1	Chr9: 100.775012	4.58	12.9	Chr12: 116.788761	0.434	71	0.00012
90	1420871_at	Gucy1b3	guanylate cyclase 1, soluble, beta 3; exons 12 and 13 and 3' UTR	Chr3: 81.836888	11.265	18	Chr5: 138.337847	0.674	71	1.57e-11	1				1		90	1437071_at	Eif1ax	eukaryotic translation initiation factor 1A, X-linked; distal 3' UTR	ChrX: 155.827042	10.022	8.6	Chr12: 57.107314	0.434	71	0.00013				1	1
91	1451109_a_at	Nedd4	neural precursor cell expressed, developmentally down-regulated gene 4 (ubiquitin ligase); mid-proximal 3' UTR	Chr9: 72.595447	11.875	15.1	Chr1: 35.595389	0.674	71	1.57e-11		1	1		1		91	1450086_at	Gmeb1	glucocorticoid modulatory element binding protein 1	Chr4: 131.781590	8.479	11.3	Chr7: 56.254112	-0.433	71	0.00013
92	1450016_at	Ccng1	cyclin G1; last three exons	Chr11: 40.564825	10.145	16.4	Chr1: 165.315110	0.673	71	1.71e-11	1						92	1446505_at	Cd84	CD84 antigen	Chr1: 173.782405	6.823	9.8	Chr12: 115.166911	-0.433	71	0.00013
93	1437354_at	Ube3a	ubiquitin protein ligase E3A; putative far 3' UTR	Chr7: 66.564545	9.656	11.4	Chr5: 138.337847	0.673	71	1.77e-11					1		93	1443726_at	Smyd1	SET and MYND domain containing 1	Chr6: 71.209641	8.851	15	Chr4: 154.365177	-0.433	71	0.00013
94	1430205_a_at	Cdc37l1	cell division cycle 37 homolog-like 1; exons 4 and 5	Chr19: 29.081461	8.935	15.3	Chr5: 133.538653	0.672	71	1.94e-11	1						94	1423149_at	Skp1a	S-phase kinase-associated protein 1A; distal 3' UTR	Chr11: 52.059927	11.301	53.5	Chr11: 51.824798	0.432	71	0.00014				1	1
95	1420620_a_at	Rnf13	ring finger protein 13; exons 4, 5, 6, and 8	Chr3: 57.600169	10.01	18.2	Chr1: 162.215218	0.672	71	2e-11	1						95	1457442_at	AW125324	expressed sequence AW125324 (non-coding); central part of sequence	Chr11: 58.168894	7.503	13	Chr15: 3.927909	-0.432	71	0.00014
96	1450017_at	Ccng1	cyclin G1; mid 3' UTR (transQTL on Chr 4 in BXD eye data)	Chr11: 40.562718	9.998	12.5	Chr12: 70.704784	0.671	71	2.08e-11			1		1		96	1457419_s_at	Anapc5	adult male testis cDNA, RIKEN full-length enriched library, clone:4933430H07 product:unknown EST, full insert sequence.	Chr5: 123.249357	6.795	11.9	Chr3: 38.788806	0.432	71	0.00014
97	1416459_at	Arf2	ADP-ribosylation factor 2; last exon and proximal 3' UTR	Chr11: 103.845007	8.898	16.5	Chr1: 35.595389	0.671	71	2.19e-11	1	1			1		97	1452355_at	Rd3	retinal degeneration 3; distal 3' UTR	Chr1: 193.809740	7.776	17.9	Chr1: 193.731996	-0.431	71	0.00014				1	1
98	1449107_at	Nudt4	nudix (nucleoside diphosphate linked moiety X)-type motif 4; last two exons and proximal 3' UTR	Chr10: 95.011857	9.811	12.9	Chr5: 138.337847	0.668	71	2.74e-11	1	1			1		98	1417833_at	AI790326	expressed sequence AI790298	Chr10: 127.980720	8.582	8.5	Chr19: 48.212355	0.431	71	0.00015
99	1416562_at	Gad1	glutamate decarboxylase 1 (brain, 67kDa); last four exons and proximal 3' UTR of long form message	Chr2: 70.437664	11.437	17	Chr5: 138.337847	0.668	71	2.86e-11	1	1			1		99	1441734_at	Camk2a	calcium/calmodulin-dependent protein kinase II alpha; intron 2 (or rare developmental 3' UTR)	Chr18: 61.102777	9.01	13.4	Chr12: 115.166911	-0.431	71	0.00015					1
100	1448060_at	Sema6d	sema domain, transmembrane domain (TM), and cytoplasmic domain, (semaphorin) 6D; proximal 3' UTR	Chr2: 124.491177	8.606	16.2	Chr5: 138.337847	0.668	71	2.92e-11		1			1		100	1441507_at	Spnb2	spectrin beta 2	Chr11: 30.117996	8.395	46.2	Chr11: 33.538733	0.429	71	0.00015
										SUMMARY	48	37	15	4	64												SUMMARY	9	4	8	17	30
Record	ID	Symbol	Description	Location(Chr:Mb)	Mean Expr	Max LRS	Max LRS Location (Chr:Mb)	Pearson r	N Cases	p-value	"Exon" Term Count	"Proximal" Term Count	"Middle" Term Count	"Distal" Term Count	"UTR" Term Count		Record	ID	Symbol	Description	Location(Chr:Mb)	Mean Expr	Max LRS	Max LRS Location (Chr:Mb)	Pearson r	N Cases	p-value	"Exon" Term Count	"Proximal" Term Count	"Middle" Term Count	"Distal" Term Count	"UTR" Term Count
1	1450319_at	Gabrb2	gamma-aminobutyric acid (GABA-A) receptor, subunit beta 2; last exon and proximal 3' UTR	Chr11: 42.440142	8.102	20.2	Chr5: 136.726447	0.943	71	0	1	1			1		1	1428204_at	Gabrb2	gamma-aminobutyric acid (GABA-A) receptor, subunit beta 2; distal 3' UTR (long 3' UTR isoform)	Chr11: 42.444613	12.048	57	Chr11: 35.986496	0.902	71	0				1	1
2	1422136_at	Uhmk1	U2AF homology motif (UHM) kinase 1; exons 3 through 7	Chr1: 172.130025	7.475	11.7	Chr5: 136.726447	0.795	71	0	1						2	1428205_x_at	Gabrb2	gamma-aminobutyric acid (GABA-A) receptor, subunit beta 2; distal 3' UTR (long 3' UTR isoform)	Chr11: 42.444613	11.819	61.7	Chr11: 35.986496	0.882	71	0				1	1
3	1452034_at	Prepl	prolyl endopeptidase-like (serine peptidase, human 2p21 hypotonia-cystinuria deletion syndrome associated); exons 10, 11, 12, 13, and proximal 3' UTR	Chr17: 85.463957	10.77	18.7	Chr5: 133.538653	0.773	71	0	1	1			1		3	1429685_at	Gabrb2	gamma-aminobutyric acid (GABA-A) receptor, subunit beta 2; distal 3' UTR (long 3' UTR isoform)	Chr11: 42.443637	11.268	82.8	Chr11: 42.185501	0.795	71	0				1	1
4	1430984_at	Oazin	ornithine decarboxylase antizyme 3	Chr15: 38.448663	7.648	8.6	Chr6: 148.692266	0.754	71	4.44e-16	1						4	1436889_at	Gabra1	gamma-aminobutyric acid (GABA-A) receptor, subunit alpha 1; distal 3' UTR	Chr11: 41.945172	12.741	124.2	Chr11: 42.185501	0.644	71	2.86e-10				1	1
5	1421621_at	Rasgrf2	RAS protein-specific guanine nucleotide-releasing factor 2	Chr13: 92.030125	7.562	9.6	Chr5: 136.726447	0.748	71	1.33e-15	1						5	1429921_at	9530068E07Rik	RIKEN cDNA 9530068E07 gene	Chr11: 52.217387	4.989	15.3	Chr11: 56.329567	0.625	71	1.5e-09
6	1420881_at	Nsd1	nuclear receptor-binding SET-domain protein 1 (histone-lysine N-methyltransferase, H3 lysine-36 and H4 lysine-20 specific, Sotos syndrome and Weaver syndrome)	Chr13: 55.415848	7.184	11.6	Chr5: 133.538653	0.743	71	2.89e-15	1						6	1421027_a_at	Mef2c	myocyte enhancer factor 2C; proximal 3' UTR	Chr13: 83.802377	11.004	10.7	Chr11: 117.108176	0.608	71	6.12e-09		1			1
7	1432646_a_at	2900097C17Rik	RIKEN cDNA 2900097C17; 3' UTR (poor probe specificity)	Chr2: 156.217883	9.707	11.7	Chr5: 136.726447	0.741	71	4e-15	1				1		7	1436842_at	B230380D07Rik	RIKEN cDNA B230380D07; 3' UTR	Chr9: 70.451220	11.145	7.2	Chr17: 47.865726	0.605	71	7.76e-09					1
8	1431062_a_at	Exoc4	exocyst complex component 4; three internal exons	Chr6: 33.246732	8.602	7.6	Chr3: 55.832831	0.734	71	1.15e-14	1						8	1451529_at	Sgtb	small glutamine-rich tetratricopeptide repeat (TPR)-containing, beta	Chr13: 104.930935	10.895	14.5	Chr11: 29.456155	0.602	71	9.99e-09
9	1431597_a_at	Nrip3	nuclear receptor interacting protein 3; last 4 exons and proximal 3' UTR	Chr7: 116.904505	8.34	19.4	Chr5: 136.726447	0.73	71	2.04e-14	1	1			1		9	1437784_at	Cbfa2t1h	CBFA2T1 identified gene homolog (human)	Chr4: 13.819213	8.519	13.6	Chr1: 144.862428	0.601	71	1.04e-08
10	1421978_at	Gad2	glutamic acid decarboxylase 2; last four exons	Chr2: 22.536821	8.218	12.5	Chr2: 24.827272	0.729	71	2.29e-14	1						10	1439477_at	Ube2b	ubiquitin-conjugating enzyme E2B, RAD6 homology; intron 3	Chr11: 51.807343	10.516	11.6	Chr11: 69.415410	0.598	71	1.35e-08
11	1418043_at	Abcc5	ATP-binding cassette, sub-family C (CFTR/MRP), member 5	Chr16: 20.392747	7.447	9.3	Chr6: 148.692266	0.728	71	2.35e-14	1						11	1438451_at	Rics	Rho GTPase-activating protein; last exon	Chr9: 32.068293	11.069	8.6	Chr12: 70.704784	0.59	71	2.35e-08	1
12	1450500_at	Uhmk1	U2AF homology motif (UHM) kinase 1	Chr1: 172.129269	7.759	13.3	Chr5: 133.538653	0.728	71	2.35e-14	1						12	1418402_at	Adam19	a disintegrin and metalloproteinase domain 19 (meltrin beta, dendritic cell marker); distal 3' UTR	Chr11: 45.960270	8.363	38.7	Chr11: 42.844126	-0.587	71	2.92e-08				1	1
13	1443665_at	5430428G01Rik	RIKEN cDNA 5430428G01 gene	Chr6: 148.941169	7.188	12.4	Chr5: 133.538653	0.726	71	3.11e-14	1						13	1437288_at	Impad1	inositol monophosphatase domain containing 1; distal 3' UTR	Chr4: 4.691518	10.149	7.2	Chr14: 124.508018	0.586	71	3.06e-08				1	1
14	1431749_a_at	Rasgrp1	RAS guanyl releasing protein 1; exons 5 and 6	Chr2: 117.124201	9.897	12.6	Chr16: 96.944467	0.72	71	7.33e-14	1						14	1423539_at	Pms2	postmeiotic segregation increased 2 (S. cerevisiae)	Chr5: 144.689902	9.104	12.2	Chr5: 144.381933	0.583	71	3.85e-08
15	1431191_a_at	Syt1	synaptotagmin 1 (synaptic vesicle calcium sensor); exons 4, 5, 6	Chr10: 108.020930	11.428	15.8	Chr5: 136.726447	0.718	71	9.17e-14	1						15	1429822_at	Abcd3	ATP-binding cassette, sub-family D (ALD), member 3	Chr3: 121.490519	7.56	10.3	Chr1: 3.482275	0.577	71	5.61e-08
16	1456422_at	D030011O10Rik	RIKEN cDNA D030011O10 gene	Chr6: 148.941700	7.065	14.1	Chr5: 119.758226	0.716	71	1.16e-13	1						16	1431554_a_at	Anxa9	annexin A9	Chr3: 95.100251	6.764	17.7	Chr15: 3.229128	-0.575	71	6.7e-08
17	1420923_at	Usp9x	ubiquitin specific protease 9, X chromosome	ChrX: 12.691676	5.071	11.3	Chr16: 93.855510	0.716	71	1.18e-13	1						17	1438575_a_at	2900056M20Rik	RIKEN cDNA 2900056M20; putative intron (from ESTs)	ChrX: 148.731464	8.031	10.9	Chr14: 124.508018	0.575	71	6.84e-08
18	1456255_at	Kiaa0368	proteasome-associated protein ECM29 homolog	Chr4: 58.857035	6.785	10	Chr5: 136.726447	0.713	71	1.86e-13	1						18	1447931_at	Whsc1l1	Wolf-Hirschhorn syndrome candidate 1-like 1 (human)	Chr8: 26.784958	10.078	10.1	Chr12: 61.268161	0.574	71	7.02e-08
19	1447944_at	Zkscan1	zinc finger protein with KRAB and SCAN domains 1; mid proximal 3' UTR	Chr5: 138.543535	8.076	29.9	Chr5: 138.337847	0.711	71	2.16e-13	1	1	1		1		19	1439692_at	Plp	proteolipid protein (myelin) 1	Chr14: 45.847680	5.819	10.7	Chr1: 25.632282	0.573	71	7.44e-08
20	1448844_at	Cyp5b	cytochrome b5 outer mitochondrial membrane; last exon and proximal 3' UTR	Chr8: 109.707476	9.448	13.6	Chr5: 136.726447	0.706	71	4.16e-13	1	1			1		20	1437372_at	Cpsf6	cleavage and polyadenylation specific factor 6; short form proximal 3' UTR	Chr10: 116.792065	6.984	12.3	Chr1: 99.958650	0.566	71	1.21e-07		1			1
21	1431197_at	Arl6ip2	ADP-ribosylation factor-like 6 interacting protein 2; first 2 exons	Chr17: 80.275114	8.478	22.2	Chr5: 138.337847	0.706	71	4.33e-13	1						21	1438301_at	Asap1	ADP-ribosylation factor-GAP with SH3 domain, ankyrin repeat and PH domain1 (development and differentiation enhancing)	Chr15: 64.021492	6.861	14.5	Chr1: 38.451548	0.566	71	1.22e-07
22	1447207_at	2810482G21Rik	RIKEN cDNA 2810482G21 gene	Chr4: 107.938497	7.387	9.9	Chr6: 98.258572	0.704	71	5.66e-13	1						22	1446102_at	D9Ertd292e	DNA segment, Chr 9, ERATO Doi 292, expressed	Chr9: 107.744146	7.454	12.2	Chr19: 15.041787	0.565	71	1.31e-07
23	1449336_a_at	Slk	STE20-like kinase (yeast)	Chr19: 47.713418	8.225	10.9	Chr5: 140.893042	0.702	71	7.24e-13	1						23	1440854_at	2810403A07Rik	RIKEN cDNA 2810403A07 gene	Chr3: 88.505415	7.111	9.9	Chr1: 25.489364	0.562	71	1.6e-07
24	1449857_at	1200011I18Rik	RIKEN cDNA 1200011I18 gene	Chr14: 76.488300	8.376	11.6	Chr5: 136.726447	0.698	71	1.04e-12	1						24	1421028_a_at	Mef2c	myocyte enhancer factor 2C; last three exons and 3' UTR	Chr13: 83.795121	10.116	11.5	Chr11: 119.216123	0.56	71	1.81e-07	1				1
25	1444141_at	Snx13	sorting nexin 13; exons 13 through 17	Chr12: 35.791441	7.195	14.4	Chr16: 96.944467	0.698	71	1.11e-12	1						25	1438268_at	Rc3h2	ring finger and CCCH-type zinc finger domains 2; last three exons	Chr2: 37.230833	9.036	14.1	Chr9: 40.929719	0.56	71	1.81e-07	1
26	1417330_at	Slc23a2	solute carrier family 23 (nucleobase transporters), member 2	Chr2: 131.882032	8.71	13	Chr5: 140.893042	0.695	71	1.56e-12	1						26	1443456_at	Diap3	diaphanous homolog 3 (Drosophila)	Chr14: 7.928289	5.747	7.9	Chr14: 10.592843	0.56	71	1.84e-07
27	1425550_a_at	Prkar1a	protein kinase, cAMP dependent regulatory, type I, alpha; last three exons and proximal 3' UTR	Chr11: 109.527193	12.387	16.6	Chr5: 136.726447	0.693	71	1.94e-12	1	1			1		27	1445427_at	Nlk	nemo like kinase; antisense in intron 1	Chr11: 78.503096	7.818	13.1	Chr19: 15.041787	0.559	71	1.94e-07
28	1445473_at	Diras2	DIRAS family, GTP-binding RAS-like 2; proximal 3' UTR	Chr13: 52.602575	9.174	14.6	Chr5: 136.726447	0.693	71	2.04e-12	1	1			1		28	1442125_at	Krit1	KRIT1, ankyrin repeat containing (cerebral cavernous malformations 1); central intron	Chr5: 3.819564	6.518	10.9	Chr1: 43.500859	0.559	71	1.97e-07
29	1450804_at	Kif5c	kinesin family member 5C (neuron-specific heavy chain); next to last exon and mid 3' UTR	Chr2: 49.612876	10.151	13.5	Chr5: 136.726447	0.693	71	2.05e-12	1		1		1		29	1445212_at	C330023M02Rik	RIKEN cDNA C330023M02 gene	Chr5: 121.853955	7.607	14.4	Chr12: 71.817797	0.557	71	2.23e-07
30	1423325_at	Pnn	pinin; exons 4 through 8	Chr12: 60.169741	8.562	9.1	Chr5: 136.726447	0.691	71	2.53e-12	1						30	1424105_a_at	Pttg1	pituitary tumor-transforming 1; exons 2 and 3 (test Mendelian 11.43)	Chr11: 43.236466	8.388	231.1	Chr11: 42.844126	0.556	71	2.36e-07	1
31	1423363_at	Sort1	sortilin 1 (trans-Golgi network transmembrane protein, neurotensin receptor 3); proximal 3' UTR	Chr3: 108.160408	10.045	9.8	Chr5: 133.538653	0.688	71	3.53e-12	1	1			1		31	1444349_at	1700124K17Rik	RIKEN cDNA 1700124K17; intron 3	Chr15: 96.135817	6.088	11.3	Chr15: 3.229128	0.555	71	2.5e-07
32	1422036_at	Strn	striatin, calmodulin binding protein; last exon and proximal half of 3' UTR	Chr17: 79.054284	7.031	8.8	Chr5: 138.337847	0.687	71	3.81e-12	1	1			1		32	1433300_at	Il1rapl1	interleukin 1 receptor accessory protein-like 1 (mental retardation); putative intron	ChrX: 84.926171	7.644	11.2	Chr1: 105.918404	0.552	71	3.08e-07
33	1420610_at	Prkacb	protein kinase, cAMP dependent, catalytic, beta; last five exons	Chr3: 146.409556	9.514	14.5	Chr5: 136.726447	0.686	71	4.08e-12	1						33	1421205_at	Atm	ataxia telangiectasia serine-protein kinase	Chr9: 53.247531	8.374	10.3	Chr8: 110.196945	0.551	71	3.26e-07
34	1450458_at	Ncoa2	nuclear receptor coactivator 2	Chr1: 13.132701	8.44	12	Chr2: 79.183599	0.686	71	4.13e-12	1						34	1441112_at	Cpsf7	cleavage and polyadenylation specificity factor 7	Chr1: 135.549579	7.971	11.2	Chr1: 3.482275	0.551	71	3.28e-07
35	1423333_at	Ergic1	endoplasmic reticulum-golgi intermediate compartment 1; last three exons and proximal 3' UTR	Chr17: 26.775693	8.838	7.2	Chr16: 96.944467	0.684	71	5.19e-12	1	1			1		35	1429463_at	Prkaa2	protein kinase, AMP-activated, alpha 2 catalytic subunit; mid and proximal 3' UTR	Chr4: 104.707713	10.111	10.8	Chr14: 124.508018	0.549	71	3.73e-07		1	1		1
36	1432385_a_at	Agtpbp1	ATP/GTP binding protein 1; exons 16 through 20	Chr13: 59.613783	8.286	19.9	Chr5: 138.337847	0.683	71	6.01e-12	1						36	1434244_x_at	Htf9c	HpaII tiny fragments locus 9c; last intron and last exon	Chr16: 18.253126	10.236	12.7	Chr1: 187.711001	-0.546	71	4.42e-07	1
37	1449634_a_at	Anks1b	ankyrin repeat and sterile alpha motif domain containing 1B; last exon	Chr10: 90.428972	9.662	12.5	Chr5: 136.726447	0.682	71	6.34e-12	1						37	1418516_at	Mtf2	metal response element binding transcription factor 2; exons 6 through 10	Chr5: 108.522370	10.489	11.7	Chr12: 61.268161	0.545	71	4.75e-07	1
38	1430395_at	4933409K03Rik	RIKEN cDNA 4933409K03 gene	Chr1: 163.081421	8.301	11.2	Chr5: 136.726447	0.682	71	6.45e-12	1						38	1438519_at	4930429H24Rik	RIKEN cDNA 4930429H24 gene	Chr16: 20.099162	8.022	10.8	Chr13: 35.965560	0.544	71	5.03e-07
39	1423402_at	Creb1	cAMP responsive element binding protein 1; middle 3' UTR	Chr1: 64.644157	7.334	10.2	Chr10: 59.648239	0.682	71	6.69e-12	1		1		1		39	1432393_a_at	Icf45	interphase cyctoplasmic foci protein 45; exons 3 and 4	Chr11: 45.765047	7.338	148.3	Chr11: 44.552712	-0.543	71	5.22e-07	1
40	1444357_at	Akap6	A kinase (PRKA) anchor protein 6	Chr12: 54.205576	7.192	17.1	Chr5: 136.726447	0.68	71	8.19e-12	1						40	1457988_at	Sec63	SEC63-like (S. cerevisiae)	Chr10: 42.488391	8.185	14.7	Chr9: 123.878247	0.543	71	5.24e-07
41	1443857_at	Hook3	hook homolog 3 (Drosophila)	Chr8: 27.141184	6.947	11.9	Chr8: 17.328896	0.678	71	9.78e-12	1						41	1422684_a_at	Exoc4	exocyst complex component 4; distal half of 3' UTR	Chr6: 33.922510	11.259	10.8	Chr1: 24.071805	0.538	71	6.94e-07				1	1
42	1452772_at	5430432P15Rik	RIKEN cDNA 5430432P15 gene	Chr19: 36.940445	6.539	17.7	Chr5: 136.726447	0.678	71	1.01e-11	1						42	1444651_at	Map2k4	mitogen activated protein kinase kinase 4	Chr11: 65.564610	8.237	20.9	Chr11: 69.415410	0.538	71	7.01e-07
43	1449214_a_at	Opa1	optic atrophy 1, mitochondrial inner membrane dynamin-related GTPase (retinal ganglion cell death and hearing loss); exons 23, 24, 25, and 26	Chr16: 29.628836	7.286	18	Chr5: 133.538653	0.678	71	1.07e-11	1						43	1457491_at	Plekha1	pleckstrin homology domain containing, family A (phosphoinositide binding specific) member 1	Chr7: 138.049043	6.699	9.2	Chr17: 75.465362	0.538	71	7.16e-07
44	1431035_at	Daam1	dishevelled associated activator of morphogenesis 1; last exon and proximal 3' UTR	Chr12: 73.090809	7.917	8.6	Chr1: 100.689876	0.676	71	1.23e-11	1	1			1		44	1438816_at	Elys	EGF, latrophilin seven transmembrane domain containing 1	Chr1: 181.719454	8.485	9.7	Chr3: 127.995451	0.537	71	7.4e-07
45	1451816_at	Zfp451	zinc finger protein 451	Chr1: 33.858843	5.89	11	Chr16: 93.855510	0.676	71	1.28e-11	1						45	1442027_at	Nbeal1	neurobeachin like 1; far 3' UTR	Chr1: 60.388072	7.121	10.2	Chr13: 35.965560	0.537	71	7.43e-07				1	1
46	1448256_at	Gosr1	golgi SNAP receptor complex member 1	Chr11: 76.543439	7.954	10.1	Chr12: 118.957586	0.676	71	1.31e-11	1						46	1441830_x_at	Akap10	A kinase (PRKA) anchor protein 10	Chr11: 61.710109	5.091	15.8	Chr9: 32.308039	0.535	71	8.26e-07
47	1430144_at	5830411G16Rik	RIKEN cDNA 5830411G16 gene	Chr6: 56.707265	6.474	10	Chr5: 133.538653	0.676	71	1.31e-11	1						47	1438390_s_at	Pttg1	pituitary tumor-transforming 1 (securin); 3' end of last exon (last 15 codons, test Mendelian 11.43)	Chr11: 43.233827	11.537	201.1	Chr11: 42.844126	0.535	71	8.37e-07	1
48	1451917_a_at	Dclk1	doublecortin-like kinase 1; four exons including 3' UTR	Chr3: 55.281726	8.345	13	Chr5: 136.726447	0.675	71	1.39e-11	1				1		48	1444557_at	Sumo1	small ubiquitin-like modifier 1 (SMT3 suppressor of mif two 3 homolog 1); last intron, possible 3' UTR of short isoform	Chr1: 59.698577	8.617	12.3	Chr1: 126.516497	0.534	71	8.75e-07					1
49	1421973_at	Gfra1	glial cell line derived neurotrophic factor family receptor alpha 1; exon 7, 8, and 10	Chr19: 58.312869	7.194	18.3	Chr5: 136.726447	0.674	71	1.56e-11	1						49	1427143_at	Jarid1b	jumonji, AT rich interactive domain 1B (Rbp2 like)	Chr1: 136.527107	9.491	13.6	Chr9: 40.929719	0.534	71	8.99e-07
50	1449087_at	Rnf141	ring finger protein 141; last three exons and proximal 3' UTR	Chr7: 12.671138	7.838	13.2	Chr5: 136.726447	0.674	71	1.58e-11	1	1			1		50	1429521_at	Alkbh8	alkB alkylation repair homolog 8; 3' UTR	Chr9: 3.385750	9.408	13.4	Chr1: 148.717644	0.534	71	9e-07					1
51	1440855_at	Mjd	Machado-Joseph disease (spinocerebellar ataxia 3, olivopontocerebellar ataxia 3, autosomal dominant, ataxin 3) homolog (human)	Chr12: 103.160451	7.993	13.2	Chr5: 136.726447	0.673	71	1.75e-11	1						51	1444140_at	Pum1	pumilio 1 (PUF family RNA-binding protein); intron 2 (from EST AK084282)	Chr4: 130.235344	6.879	10.5	Chr12: 70.704784	0.534	71	9.17e-07
52	1427188_at	Arih1	ariadne ubiquitin-conjugating enzyme E2 binding protein homolog 1 (Drosophila)	Chr9: 59.240115	9.538	13.2	Chr8: 102.254875	0.672	71	1.89e-11	1						52	1437179_at	Rif1	Rap1 interacting factor 1; exons 20, 21, 22	Chr2: 51.959072	7.54	12.9	Chr9: 40.929719	0.532	71	9.9e-07	1
53	1451631_at	P15rs	cyclin-dependent kinase inhibitor 2B-related protein; last three exons and proximal 3' UTR	Chr18: 24.646649	9.622	18.2	Chr5: 136.726447	0.672	71	1.89e-11	1	1			1		53	1443037_at	Nptn	neuroplastin (Ig superfamily transmembrane protein); first intron, highly expressed (from EST AK039199)	Chr9: 58.468502	11.056	10	Chr1: 148.717644	0.532	71	1.03e-06
54	1460599_at	Ermp1	endoplasmic reticulum metallopeptidase 1; last 4 exons and proximal 3' UTR	Chr19: 29.686935	8.524	13.9	Chr5: 140.893042	0.672	71	1.94e-11	1	1			1		54	1456781_at	B230215L15Rik	RIKEN cDNA B230215L15; putative anti-sense of intron (from ESTs)	Chr3: 34.542113	9.036	10.6	Chr6: 98.258572	0.532	71	1.03e-06
55	1420816_at	Ywhag	3-monooxgenase/tryptophan 5-monooxgenase activation protein, gamma polypeptide (protein kinase C inhibitor protein 1); last exon and proximal 3' UTR	Chr5: 136.386855	9.115	11.1	Chr5: 136.726447	0.671	71	2.14e-11	1	1			1		55	1437216_at	Ccdc88a	coiled coil domain containing 88A; mid 3' UTR	Chr11: 29.408832	10.815	53.1	Chr11: 33.538733	0.531	71	1.06e-06			1		1
56	1451072_a_at	Rnf4	ring finger protein 4; exons 3, 5 through 7, and proximal 3' UTR	Chr5: 34.692588	10.194	15.6	Chr5: 136.726447	0.67	71	2.23e-11	1	1			1		56	1438580_at	Zcchc7	zinc finger, CCHC domain containing 7; distal 3' UTR	Chr4: 44.924379	9.462	12.3	Chr1: 126.516497	0.53	71	1.11e-06				1	1
57	1431655_a_at	Agk	acylglycerol kinase (multi-substrate lipid kinase); last five exons of short form message	Chr6: 40.302348	8.293	14.5	Chr5: 136.726447	0.67	71	2.28e-11	1						57	1442671_at	Hip2	huntingtin interacting protein 2	Chr5: 65.969172	7.195	11.7	Chr1: 144.862428	0.53	71	1.14e-06
58	1428195_at	4631427C17Rik	RIKEN cDNA 4631427C17; last 6 exons except last exon and proximal 3' UTR	Chr6: 29.853188	9.455	7.7	Chr4: 31.651725	0.67	71	2.33e-11	1	1			1		58	1446148_x_at	Rnpc2	RNA-binding region (RNP1, RRM) containing 2; intron 4	Chr2: 155.995291	8.625	8.2	Chr12: 71.948670	0.529	71	1.23e-06
59	1443412_s_at	Mmp16	matrix metalloproteinase 16	Chr4: 18.020475	6.297	20.2	Chr5: 136.726447	0.67	71	2.44e-11	1						59	1445862_at	BC031575	cDNA sequence BC031575	Chr16: 14.141168	8.761	11.3	Chr9: 123.878247	0.527	71	1.34e-06
60	1453988_a_at	Ide	insulin degrading enzyme; exons 14, 15, 16, and 17	Chr19: 37.384301	7.483	9.4	Chr9: 108.961891	0.669	71	2.68e-11	1						60	1455840_at	Rapgef5	Rap guanine nucleotide exchange factor (GEF) 5; far 3' UTR	Chr12: 118.995111	10.681	9.6	Chr6: 101.797292	0.527	71	1.35e-06				1	1
61	1438070_at	Phf3	PHD finger protein 3; last five exons	Chr1: 30.862749	8.261	25.8	Chr5: 136.726447	0.668	71	2.85e-11	1						61	1446197_at	Lphn3	latrophilin 3; intron	Chr5: 82.009485	8.47	14.5	Chr17: 49.697205	0.527	71	1.37e-06
62	1421200_at	Dlg2	discs, large 2 (postsynaptic density protein 93 kD, chapsyn 110); mid proximal 3' UTR	Chr7: 99.593643	8.15	14.5	Chr5: 133.538653	0.667	71	3.06e-11	1	1	1		1		62	1440807_at	Magi2	membrane associated guanylate kinase, WW and PDZ domain containing 2; intron 4	Chr5: 19.735800	8.138	11.9	Chr1: 25.632282	0.526	71	1.39e-06
63	1431068_at	Rmnd5a	required for meiotic nuclear division 5 homolog A; mid 3' UTR	Chr6: 71.342029	8.357	13.2	Chr5: 136.726447	0.667	71	3.17e-11	1		1		1		63	1443285_at	Gria4	glutamate receptor, ionotropic, AMPA4 (alpha 4); apparent proximal intron 1	Chr9: 4.756099	7.256	14	Chr19: 22.531308	0.526	71	1.44e-06		1
64	1445259_at	Scn2a2	sodium channel, voltage-gated, type II, alpha 2; two exons	Chr2: 65.520435	8.358	9.2	Chr4: 153.804166	0.667	71	3.18e-11	1						64	1423316_at	Tmem39a	transmembrane protein 39a	Chr16: 38.586490	9.441	8.8	Chr2: 102.941478	-0.526	71	1.47e-06
65	1437257_at	Wdr47	WD repeat domain 47; exons 4 and 5	Chr3: 108.421747	9.092	18.2	Chr5: 138.337847	0.666	71	3.44e-11	1						65	1455766_at	Gabra1	gamma-aminobutyric acid (GABA-A) receptor, subunit alpha 1; distal 3' UTR (good performance)	Chr11: 41.944474	12.702	27.6	Chr11: 42.185501	0.525	71	1.51e-06				1	1
66	1455986_at	Zdhhc17	zinc finger, DHHC domain containing 17; 3' UTR	Chr10: 110.381001	6.673	17	Chr16: 97.617114	0.666	71	3.59e-11	1				1		66	1438688_at	Srrm2	serine/arginine repetitive matrix 2	Chr17: 23.943917	12.029	11.7	Chr12: 70.704784	0.525	71	1.52e-06
67	1431129_at	Usp31	ubiquitin specific protease 31; 3' UTR	Chr7: 128.788569	7.832	12.4	Chr5: 133.538653	0.665	71	3.76e-11	1				1		67	1442254_at	A130082F03Rik	ESTs	Chr1: 89.752863	9.039	11.4	Chr17: 49.697205	0.524	71	1.6e-06
68	1439076_at	Dhx29	DEAH (Asp-Glu-Ala-His) box polypeptide 29	Chr13: 113.734728	7.316	14.6	Chr5: 136.726447	0.664	71	4.22e-11	1						68	1440511_at	Psme4	proteasome (prosome, macropain) activator subunit 4	Chr11: 30.695253	7.346	30.4	Chr11: 33.538733	0.522	71	1.75e-06
69	1421327_at	Mtap2	microtubule-associated protein 2; last three exons and proximal 3' UTR	Chr1: 66.480124	9.918	22.8	Chr5: 133.538653	0.664	71	4.36e-11	1	1			1		69	1445676_at	Kcnn2	potassium intermediate/small conductance calcium-activated channel, subfamily N, member 2; second to last intron	Chr18: 45.840208	9.522	10.5	Chr14: 124.508018	0.522	71	1.79e-06
70	1455841_s_at	Grwd1	glutamate-rich WD repeat containing 1	Chr7: 53.080623	8.989	13.2	Chr5: 136.726447	-0.662	71	5.03e-11	1						70	1422839_at	Neurog2	neurogenin 2; distal half of 3' UTR	Chr3: 127.337972	6.558	13.8	Chr1: 163.955812	-0.522	71	1.83e-06				1	1
71	1452638_s_at	Dnm1l	dynamin 1-like; last two exons (5 and 6) of short form message	Chr16: 16.336958	8.304	16	Chr5: 138.337847	0.661	71	5.63e-11	1						71	1420342_at	Pbef1	pre-B-cell colony-enhancing factor 1; intron 1	Chr12: 33.511201	9.33	10.7	Chr9: 40.929719	0.521	71	1.93e-06
72	1444513_at	Cnksr2	connector enhancer of kinase suppressor of Ras 2; exons 1 and 2	ChrX: 154.434535	8.851	13.8	Chr5: 136.726447	0.66	71	6.17e-11	1						72	1444845_at	Scfd1	sec1 family domain containing 1	Chr12: 52.479009	7.441	11.9	Chr14: 124.508018	0.519	71	2.09e-06
73	1435009_at	Slc9a6	solute carrier family 9 (sodium/hydrogen exchanger), isoform 6; last exon and proximal 3' UTR	ChrX: 53.914373	8.806	15.7	Chr5: 133.538653	0.66	71	6.57e-11	1	1			1		73	1415947_at	Creg1	cellular repressor of E1A-stimulated genes 1	Chr1: 167.694215	8.938	20.5	Chr1: 168.913137	0.519	71	2.09e-06
74	1421298_a_at	Hipk1	homeodomain interacting protein kinase 1; last exon and 3' UTR	Chr3: 103.547621	6.913	15.7	Chr14: 23.777999	0.66	71	6.61e-11	1				1		74	1442276_at	Lphn3	latrophilin 3; intron	Chr5: 81.661822	8.393	14.3	Chr9: 40.929719	0.519	71	2.09e-06
75	1452503_a_at	Wdr9	WD repeat domain 8	Chr16: 96.231482	6.669	12.2	Chr19: 44.265919	0.659	71	6.77e-11	1						75	1440083_at	Cdc42	cell division cycle 42 (activator of Rac); intron 1	Chr4: 136.892392	7.56	10.1	Chr1: 25.632282	0.519	71	2.12e-06
76	1432344_a_at	Aplp2	amyloid beta (A4) precursor-like protein 2; exons 3 and 4	Chr9: 30.979518	9.783	13.5	Chr5: 136.726447	0.659	71	7.07e-11	1						76	1445065_at	1300012C15Rik	1300012C15Rik EST; antisense in intron of Atp11c	ChrX: 57.643092	5.182	10.7	Chr19: 15.041787	0.519	71	2.17e-06
77	1425187_at	Sel1h	Sel1 (suppressor of lin-12) 1 homolog; proximal 3' UTR	Chr12: 93.047107	10.007	16	Chr5: 136.726447	0.659	71	7.15e-11	1	1			1		77	1455826_a_at	Bace1	beta-site APP cleaving enzyme 1 (beta secretase); distal 3' UTR	Chr9: 45.670189	9.906	12.3	Chr9: 40.929719	0.519	71	2.17e-06				1	1
78	1451793_at	4930429H24Rik	RIKEN cDNA 4930429H24 gene	Chr16: 20.120305	8.101	9.5	Chr16: 93.855510	0.659	71	7.35e-11	1						78	1439998_at	D630035I23Rik	RIKEN cDNA D630035I23 gene	Chr10: 66.653932	8.299	14.5	Chr1: 118.454508	0.517	71	2.37e-06
79	1446652_at	Reps2	RALBP1 associated Eps domain containing protein 2	ChrX: 158.854619	7.541	11.4	Chr16: 96.944467	0.657	71	8.26e-11	1						79	1418539_a_at	Ptpre	protein tyrosine phosphatase, receptor type, E	Chr7: 142.869892	10.623	10.8	Chr19: 12.404870	0.517	71	2.39e-06
80	1460386_a_at	Slc1a1	solute carrier family 1 (neuronal/epithelial high affinity glutamate transporter, system Xag), member 1; last 4 exons and second to last intron	Chr19: 28.979820	9.113	17.3	Chr5: 133.538653	0.657	71	8.46e-11	1						80	1446147_at	Rnpc2	RNA-binding region (RNP1, RRM) containing 2	Chr2: 155.995701	8.87	8.5	Chr3: 55.832831	0.517	71	2.42e-06
81	1439289_s_at	Pnmal1	PNMA-like 1; exon 1	Chr7: 17.545772	8.556	16	Chr5: 136.726447	0.655	71	1.04e-10	1						81	1451020_at	Gsk3b	glycogen synthase kinase 3 beta; last 3 exons and proximal 3' UTR	Chr16: 38.220071	9.13	10.8	Chr15: 3.229128	0.517	71	2.43e-06	1	1			1
82	1426086_a_at	Fmr1	fragile X mental retardation 1, RNA-binding protein (disease-causing CAG repeat expansion in human 5' UTR); last four exons	ChrX: 65.961269	8.207	24.6	Chr5: 136.726447	0.655	71	1.05e-10	1				1		82	1431028_a_at	Pank1	pantothenate kinase 1; last 4 exons and proximal 3' UTR (transQTL on Chr 4 in BXD eye data)	Chr19: 34.886667	8.186	8.1	Chr9: 40.929719	0.516	71	2.48e-06	1	1			1
83	1431229_at	Anks1b	ankyrin repeat and sterile alpha motif domain containing 1B; three exons	Chr10: 90.039874	8.782	15.9	Chr10: 87.106143	0.655	71	1.07e-10	1						83	1424848_at	Kcnma1	potassium large conductance calcium-activated channel, subfamily M, alpha member 1; far 3' UTR	Chr14: 24.117993	8.382	11.9	Chr1: 38.451548	0.516	71	2.56e-06				1	1
84	1430692_a_at	Sel1h	Sel1 (suppressor of lin-12) 1 homolog; proximal 3' UTR	Chr12: 93.047738	9.804	14.2	Chr5: 136.726447	0.654	71	1.15e-10	1	1			1		84	1438871_at	Son	Son cell proliferation protein	Chr16: 91.669102	7.897	13.6	Chr1: 126.516497	0.515	71	2.62e-06
85	1429886_at	Zfp294	zinc finger protein 294	Chr16: 87.413498	6.058	11.3	Chr5: 136.726447	0.653	71	1.25e-10	1						85	1458509_at	4932412H11	ESTs	Chr9: 14.615244	7.603	10.4	Chr6: 98.028110	0.515	71	2.62e-06
86	1421876_at	Mapk9	mitogen activated protein kinase 9; last 5 exons except second to last exon	Chr11: 49.691759	9.027	16.2	Chr5: 136.726447	0.652	71	1.33e-10	1						86	1457047_at	Snrp70	U1 small nuclear ribonucleoprotein 70 kDa; antisense in intron 5	Chr7: 52.640644	7.856	15	Chr9: 40.929719	0.515	71	2.63e-06
87	1448348_at	Gpiap1	cell cycle associated protein 1 (cytoplasmic activation- and proliferation-associated protein 1); exons 9 through 12	Chr2: 103.613167	9.462	17.1	Chr5: 136.726447	0.652	71	1.41e-10	1						87	1441522_at	9330178D15	hypothetical protein 9330178D15	Chr8: 13.260003	8.3	13.3	Chr15: 87.788313	0.515	71	2.7e-06
88	1450528_at	B3galt5	UDP-Gal:betaGlcNAc beta 1,3-galactosyltransferase, polypeptide 5	Chr16: 96.537188	7.017	9.2	Chr6: 101.797292	0.652	71	1.42e-10	1						88	1433205_at	Ndfip2	Nedd4 family interacting protein 2	Chr14: 105.658772	8.057	15.2	Chr14: 106.286762	0.514	71	2.82e-06
89	1415795_at	Spin1	spindlin; exons 2 and 3 of short forms	Chr9: 51.207945	8.305	8.7	Chr5: 136.726447	0.652	71	1.44e-10	1						89	1442950_at	Nrg3	neuregulin 3; first intron (high expression from EST BB024097)	Chr14: 40.029256	10.816	10.2	Chr1: 148.717644	0.514	71	2.82e-06
90	1437648_at	Pcyt1b	phosphate cytidylyltransferase 1, choline, beta isoform	ChrX: 90.991958	8.206	10.3	Chr5: 136.726447	0.651	71	1.52e-10	1						90	1455827_at	Mbnl2	muscleblind-like 2; proximal 3' UTR	Chr14: 120.828354	12.408	13.7	Chr1: 118.454508	0.514	71	2.87e-06		1			1
91	1431385_a_at	Mbtps1	membrane-bound transcription factor protease, site 1	Chr8: 122.071300	6.014	8.1	Chr5: 136.726447	0.65	71	1.69e-10	1						91	1444273_at	Ptprj	protein tyrosine phosphatase, receptor type, J	Chr2: 90.408524	9.427	13.2	Chr1: 118.454508	0.513	71	2.92e-06
92	1434256_s_at	Cds2	CDP-diacylglycerol synthase (phosphatidate cytidylyltransferase) 2; distal 3' UTR	Chr2: 132.132933	8.731	9.2	Chr6: 101.797292	0.649	71	1.85e-10	1			1	1		92	1460436_at	Ndst1	N-deacetylase/N-sulfotransferase (heparan glucosaminyl) 1	Chr18: 60.845690	11.951	10	Chr1: 38.451548	0.513	71	2.95e-06
93	1452413_at	C230081A13Rik	RIKEN cDNA C230081A13 gene	Chr9: 56.052988	6.966	7.8	Chr2: 79.183599	0.648	71	1.97e-10	1						93	1439686_at	Mbnl1	muscleblind-like 1 (Drosophila)	Chr3: 60.330753	6.346	8.1	Chr12: 71.948670	0.512	71	3.04e-06
94	1418290_a_at	Ezh1	enhancer of zeste homolog 1 (Drosophila)	Chr11: 101.062196	8.667	9.8	Chr5: 15.759205	0.647	71	2.12e-10	1						94	1459133_at	B130066H01Rik	ESTs	Chr1: 153.634622	8.166	14.2	Chr1: 118.454508	0.512	71	3.09e-06
95	1429607_at	Trak2	amyotrophic lateral sclerosis 2 (juvenile) chromosome region, candidate 3 homolog(human); exons 4 and 5	Chr1: 58.975616	7.161	6.9	Chr6: 101.797292	0.645	71	2.68e-10	1						95	1457765_at	Psmd14	proteasome (prosome, macropain) 26S subunit, non-ATPase, 14	Chr2: 61.576094	7.633	9.6	Chr17: 49.562368	0.511	71	3.22e-06
96	1426346_at	Prepl	prolyl endopeptidase-like; mid to distal 3' UTR	Chr17: 85.463026	11.623	16.4	Chr5: 133.538653	0.645	71	2.76e-10	1		1	1	1		96	1441570_at	Pet112l	PET112-like (yeast)	Chr3: 117.970423	8.676	11.1	Chr1: 144.862428	0.511	71	3.27e-06
97	1425805_a_at	Usp12	ubiquitin specific protease 12; exons 4, 5, 7, 9	Chr5: 147.551871	7.879	9.9	Chr6: 101.797292	0.644	71	2.87e-10	1						97	1447146_s_at	Slu7	SLU7 splicing factor homolog; mid proximal 3' UTR	Chr11: 43.260237	11.245	11.1	Chr11: 56.329567	-0.511	71	3.3e-06		1	1		1
98	1418768_at	Opa1	optic atrophy 1, mitochondrial inner membrane dynamin-related GTPase (retinal ganglion cell death and hearing loss); 3' UTR	Chr16: 29.651986	9.317	15	Chr5: 133.538653	0.644	71	2.9e-10	1				1		98	1435267_at	AK031601	AK031601 non-coding sequence expressed in pancreas and testis; 3' end of sequence	Chr8: 19.799282	10.685	46	Chr8: 18.512781	0.51	71	3.51e-06
99	1430449_at	Kidins220	kinase D-interacting substance of 220 kDa (ankyrin repeat-rich membrane spanning); exons 4, 5, 6, and 7	Chr12: 25.674658	7.562	9.2	Chr14: 65.324728	0.642	71	3.39e-10	1						99	1442295_at	Arpc2	actin related protein 2/3 complex, subunit 2	Chr1: 74.293082	6.923	11.7	Chr17: 51.338300	0.509	71	3.6e-06
100	1430671_a_at	Brox	BRO1 domain and CAAX motif containing	Chr6: 112.555576	7.61	20.8	Chr5: 136.726447	0.642	71	3.4e-10							100	1457176_at	Garnl1	GTPase activating RANGAP domain-like 1; intron (from EST AK037081)	Chr12: 56.780463	9.163	12.8	Chr1: 38.451548	0.509	71	3.62e-06
										SUMMARY	99	22	6	2	34												SUMMARY	11	8	3	14	26
Record	ID	Symbol	Description	Location(Chr:Mb)	Mean Expr	Max LRS	Max LRS Location (Chr:Mb)	Pearson r	N Cases	p-value	"Exon" Term Count	"Proximal" Term Count	"Middle" Term Count	"Distal" Term Count	"UTR" Term Count		Record	ID	Symbol	Description	Location(Chr:Mb)	Mean Expr	Max LRS	Max LRS Location (Chr:Mb)	Pearson r	N Cases	p-value	"Exon" Term Count	"Proximal" Term Count	"Middle" Term Count	"Distal" Term Count	"UTR" Term Count
1	1418177_at	Gabrg2	gamma-aminobutyric acid (GABA-A) receptor, subunit gamma 2; exons 8 and 10 and proximal 3' UTR (last two exons are alternatively spliced by Nova1)	Chr11: 41.725716	11.75	21.5	Chr5: 138.337847	1	71	0	1	1			1		1	1437147_at	Gabrg2	gamma-aminobutyric acid (GABA-A) receptor, subunit gamma 2; mid distal 3' UTR	Chr11: 41.724032	10.07	38.2	Chr11: 42.185501	1	71	0			1	1	1
2	1437513_a_at	Serinc1	serine incorporator 1; exon 3	Chr10: 57.245131	12.48	19.3	Chr5: 138.337847	0.893	71	0	1						2	1415788_at	Ublcp1	ubiquitin-like domain containing CTD phosphatase 1; mid 3' UTR	Chr11: 44.268295	10.718	16.7	Chr11: 44.227083	0.688	71	3.27e-12			1		1
3	1428087_at	Dnm1l	dynamin 1-like; proximal 3' UTR	Chr16: 16.313632	11.78	17.1	Chr5: 133.538653	0.874	71	0		1			1		3	1436889_at	Gabra1	gamma-aminobutyric acid (GABA-A) receptor, subunit alpha 1; distal 3' UTR	Chr11: 41.945172	12.741	124.2	Chr11: 42.185501	0.68	71	8.12e-12				1	1
4	1450385_at	Kpna3	karyopherin (importin) alpha 3; proximal 3' UTR	Chr14: 61.986036	9.766	19.8	Chr5: 138.337847	0.872	71	0		1			1		4	1449176_a_at	Dck	deoxycytidine kinase (drug resistance and sensitivity); mid-distal 3' UTR	Chr5: 89.211708	7.187	13.2	Chr5: 4.468199	0.661	71	5.99e-11			1	1	1
5	1449574_a_at	Cdc42	cell division cycle 42 (activator of rac; gephyrin and collybistin signaling partner in inhibitory postsynaptic receptor complex); exons 2, 3, 4	Chr4: 136.884688	12.873	23.4	Chr5: 138.337847	0.872	71	0	1						5	1418073_at	Acate2	acetyl-Coenzyme A acetyltransferase 3; next to last exon	ChrX: 151.731159	9.346	11.2	Chr12: 70.704784	0.658	71	7.82e-11	1
6	1415882_at	Ghitm	growth hormone inducible transmembrane protein; exons 6 and 7, and proximal 3' UTR	Chr14: 37.935159	12.528	20.4	Chr5: 138.337847	0.862	71	0	1	1			1		6	1434856_at	Ankrd44	ankyrin repeat domain 44; distal 3' UTR	Chr1: 54.702425	7.471	11.8	Chr12: 114.496726	0.656	71	9.42e-11				1	1
7	1449262_s_at	Lin7c	Lin-7 type 3 (Veli3-CASK-Mint1 complex, PDZ domain, synapse and cell-cell junction associated, NMDA synaptic receptor complex chaperone); mid 3' UTR	Chr2: 109.738474	9.726	16	Chr5: 136.726447	0.857	71	0			1		1		7	1421281_at	Gabra1	gamma-aminobutyric acid (GABA-A) receptor, subunit alpha 1; mid proximal 3' UTR (overlaps rs29420426, rs28224565)	Chr11: 41.946133	12.055	93.1	Chr11: 42.631876	0.643	71	3.22e-10		1	1		1
8	1450846_at	Bzw1	basic leucine zipper and W2 domains 1; exons 3, 5, and 7	Chr1: 58.455883	10.558	17.2	Chr5: 138.337847	0.85	71	0	1						8	1455267_at	Esrrg	estrogen-related receptor gamma; distal 3' UTR	Chr1: 190.038178	8.522	9.9	Chr12: 110.698472	0.641	71	3.84e-10				1	1
9	1420828_s_at	Ywhaq	tyrosine 3-monooxygenase/tryptophan 5-monooxygenase activation protein, theta (14-3-3 protein theta); last four exons	Chr12: 21.397132	12.72	17.9	Chr5: 138.337847	0.849	71	0	1						9	1426819_at	Hipk3	homeodomain interacting protein kinase 3 isoform; 3 ' UTR (Fosb-like sequence)	Chr2: 104.266664	10.815	12.5	Chr12: 112.426348	0.64	71	4.16e-10					1
10	1452638_s_at	Dnm1l	dynamin 1-like; last two exons (5 and 6) of short form message	Chr16: 16.336958	8.304	16	Chr5: 138.337847	0.843	71	0	1						10	1419401_at	Asb13	ankyrin repeat and SOCS box-containing protein 13; mid-distal 3' UTR	Chr13: 3.650446	8.28	10.5	Chr4: 154.365177	0.637	71	5.58e-10			1	1	1
11	1425929_a_at	Rnf14	ring finger protein 14; last three exons and proximal 3' UTR	Chr18: 38.472907	11.306	20.5	Chr5: 138.337847	0.837	71	0	1	1			1		11	1433957_at	C030048B08Rik	hypothetical protein LOC84060	Chr5: 3.584059	7.936	16	Chr12: 115.166911	0.635	71	6.62e-10
12	1448309_at	Ap3m1	adaptor-related protein complex 3, mu 1 subunit; last four exons and proximal 3' UTR	Chr14: 21.855895	9.123	14.1	Chr1: 29.231425	0.835	71	0	1	1			1		12	1439044_at	Zfp354c	zinc finger protein 354C	Chr11: 50.624900	9.088	30.3	Chr11: 50.558768	0.632	71	8.64e-10
13	1440228_at	Ranbp6	RAN binding protein 6; only exon	Chr19: 29.884579	9.366	19.8	Chr5: 138.337847	0.834	71	0	1						13	1427402_at	1810060D16Rik	RIKEN cDNA 1810060D16 gene	Chr15: 78.981597	9.494	21.3	Chr12: 115.166911	-0.628	71	1.18e-09
14	1416794_at	Arl6ip2	ADP-ribosylation factor-like 6 interacting protein 2; exon 9	Chr17: 80.252004	8.891	14.3	Chr1: 157.588921	0.833	71	0	1						14	1437067_at	Phtf2	putative homeodomain transcription factor 2; distal 3' UTR	Chr5: 20.264753	6.613	11.8	Chr12: 114.553844	0.625	71	1.51e-09				1	1
15	1449086_at	Rnf141	ring finger protein 141; proximal to mid 3' UTR	Chr7: 117.959100	9.134	24.7	Chr5: 136.726447	0.832	71	0		1	1		1		15	1429351_at	Klhl24	kelch-like 24; mid 3' UTR	Chr16: 20.124956	9.027	12.5	Chr5: 118.329638	0.624	71	1.61e-09			1		1
16	1421448_at	Garnl1	GTPase activating RANGAP domain-like 1; exons 32, 33, 34, and 35	Chr12: 56.741593	10.259	16.1	Chr5: 133.538653	0.831	71	0	1						16	1416631_at	Ap4b1	adaptor-related protein complex AP-4, beta 1	Chr3: 103.625379	7.575	8.8	Chr4: 154.365177	0.622	71	1.94e-09
17	1421176_at	Rasgrp1	RAS guanyl releasing protein 1; last three exons	Chr2: 117.110591	9.982	18.6	Chr5: 138.337847	0.83	71	0	1						17	1456516_x_at	Uap1	UDP-N-acetylglucosamine pyrophosphorylase 1; mid distal 3' UTR	Chr1: 172.072207	6.562	16.5	Chr12: 116.788761	0.62	71	2.23e-09			1	1	1
18	1431746_a_at	Ube1c	ubiquitin-activating enzyme E1C; exons 13 and 14 and far 3' UTR	Chr6: 97.132307	10.685	15.6	Chr1: 165.315110	0.829	71	0	1				1		18	1421137_a_at	Pkib	protein kinase inhibitor beta, cAMP dependent, testis specific	Chr10: 57.456417	7.566	14.8	Chr12: 76.993653	0.62	71	2.31e-09
19	1429187_at	Tmed7	transmembrane emp24 protein transport domain containing 7; last exon and proximal 3' UTR	Chr18: 46.748053	10.177	17.7	Chr5: 136.726447	0.829	71	0	1	1			1		19	1416161_at	Rad21	RAD21 homolog; distal 3' UTR	Chr15: 51.794330	11.007	15.6	Chr12: 76.396441	0.62	71	2.37e-09				1	1
20	1454811_a_at	Serinc1	serine incorporator 1; last exon and proximal 3' UTR	Chr10: 57.236935	12.93	15.2	Chr5: 142.540279	0.825	71	0	1	1			1		20	1450744_at	Galnt2	UDP-N-acetyl-alpha-D-galactosamine:polypeptide N-acetylgalactosaminyltransferase 2	Chr8: 126.822575	9.002	15.7	Chr5: 4.468199	0.619	71	2.43e-09
21	1431045_at	Fam49a	family with sequence similarity 49, member A, zinc finger, highly expressed in CNS; mid 3' UTR	Chr12: 12.380409	9.514	18.5	Chr5: 138.337847	0.823	71	0			1		1		21	1424683_at	Fam134b	family with sequence similarity 134, member B; distal 3' UTR	Chr15: 25.902920	11.077	13.7	Chr12: 114.553844	0.616	71	3.11e-09				1	1
22	1445631_at	Tmem16c	transmembrane protein 16C (tumor expressed); last exon and proximal 3' UTR	Chr2: 110.498157	8.919	17.7	Chr5: 138.337847	0.822	71	0	1	1			1		22	1420822_s_at	Sgpp1	sphingosine-1-phosphate phosphatase 1; distal 3' UTR	Chr12: 76.815288	9.106	21.1	Chr12: 76.832202	0.616	71	3.13e-09				1	1
23	1424070_at	Napg	N-ethylmaleimide sensitive fusion protein attachment protein gamma; last two exons and proximal 3' UTR	Chr18: 63.156589	10.215	22.1	Chr5: 136.726447	0.82	71	0	1	1	1		1		23	1452839_at	2410012M04Rik	RIKEN cDNA 2410012M04 gene	Chr3: 115.631702	8.5	16.1	Chr12: 59.053626	0.615	71	3.5e-09
24	1420871_at	Gucy1b3	guanylate cyclase 1, soluble, beta 3; exons 12 and 13 and 3' UTR	Chr3: 81.836888	11.265	18	Chr5: 138.337847	0.818	71	0	1				1		24	1436868_at	Rtn4rl1	reticulon 4 receptor-like 1; mid 3' UTR	Chr11: 75.079888	10.419	10.5	Chr17: 49.562368	-0.611	71	4.67e-09			1		1
25	1450143_at	Rasgrp1	RAS guanyl releasing protein 1; proximal 3' UTR	Chr2: 117.107599	10.687	17.3	Chr5: 138.337847	0.817	71	0		1			1		25	1424343_a_at	Eif1a	eukaryotic translation initiation factor 1A	Chr18: 46.768248	9.332	11	Chr4: 154.365177	0.611	71	4.69e-09
26	1450006_at	Ncoa4	nuclear receptor coactivator 4; exons 7 and 8	Chr14: 32.989869	10.536	11.6	Chr2: 75.856729	0.816	71	0	1						26	1454625_at	Phf6	PHD finger protein 6; distal 3' UTR	ChrX: 50.309527	7.285	11.9	Chr4: 154.365177	0.611	71	4.74e-09				1	1
27	1431196_at	Atp2c1	ATPase, Ca++-sequestering; exons 4 through 11 except exon 10	Chr9: 105.361989	9.161	23.6	Chr5: 136.726447	0.811	71	0	1						27	1440861_a_at	Kcnc3	potassium voltage gated channel, Shaw-related subfamily, member 3; last two exons and proximal 3' UTR	Chr7: 51.853797	10.257	13.9	Chr12: 69.125067	-0.61	71	5.35e-09	1	1			1
28	1449137_at	Pdha1	pyruvate dehydrogenase E1 alpha 1; last 2 exons and proximal 3' UTR	ChrX: 156.561648	11.132	17.2	Chr5: 138.337847	0.809	71	0	1	1			1		28	1449181_at	Fech	ferrochelatase; distal 3' UTR	Chr18: 64.616212	9.917	10.8	Chr12: 76.103690	0.608	71	5.89e-09				1	1
29	1416562_at	Gad1	glutamate decarboxylase 1 (brain, 67kDa); last four exons and proximal 3' UTR of long form message	Chr2: 70.437664	11.437	17	Chr5: 138.337847	0.806	71	0	1	1			1		29	1454604_s_at	Tspan12	tetraspanin 12; distal 3' UTR	Chr6: 21.721463	6.895	15.5	Chr12: 114.553844	0.608	71	5.96e-09				1	1
30	1435075_at	Tmem106b	transmembrane protein 106B with DUF1356 domain (possible Htr2c network member); 3' UTR	Chr6: 13.036756	8.722	15.2	Chr1: 29.231425	0.804	71	0					1		30	1434039_at	Appbp2	amyloid beta precursor protein (cytoplasmic tail) binding protein 2; far 3' UTR	Chr11: 85.000943	9.85	11.5	Chr8: 7.701081	0.608	71	6.16e-09					1
31	1443957_at	Dixdc1	DIX domain containing 1; proximal 3' UTR	Chr9: 50.473424	8.448	10.6	Chr1: 36.052583	0.803	71	0		1			1		31	1444505_at	Rai17	retinoic acid induced 17	Chr14: 26.476272	7.374	9.5	Chr12: 70.704784	-0.607	71	6.29e-09
32	1423598_at	Atp8a1	ATPase, aminophospholipid transporter (APLT), class I, type 8A, member 1 (ATPase II, aminophospholipid translocase); mid 3' UTR	Chr5: 68.012010	9.945	18.2	Chr5: 133.538653	0.8	71	0			1		1		32	1448743_at	Ssx2ip	synovial sarcoma, X breakpoint 2 interacting protein; mid distal 3' UTR	Chr3: 146.102558	10.773	13.7	Chr5: 123.738718	0.606	71	7.31e-09			1	1	1
33	1439214_a_at	Api5	apoptosis inhibitor 5; proximal 3' UTR	Chr2: 94.253669	8.388	14.9	Chr1: 162.215218	0.8	71	0		1			1		33	1455766_at	Gabra1	gamma-aminobutyric acid (GABA-A) receptor, subunit alpha 1; distal 3' UTR (good performance)	Chr11: 41.944474	12.702	27.6	Chr11: 42.185501	0.605	71	7.41e-09				1	1
34	1438361_at	2310035C23Rik	RIKEN cDNA 2310035C23 gene	Chr1: 107.616061	6.368	13.1	Chr1: 35.595389	0.8	71	0							34	1415829_at	Lbr	lamin B receptor	Chr1: 183.745574	8.414	11.5	Chr14: 39.961748	0.604	71	8.11e-09
35	1415828_a_at	Serp1	stress-associated endoplasmic reticulum protein 1; last 3 exons and proximal 3' UTR	Chr3: 58.327569	9.937	17	Chr5: 136.726447	0.799	71	0	1	1			1		35	1459998_at	Zfp407	zinc finger protein 407; putative far 3' UTR (from Homo ZNF407)	Chr18: 84.377145	8.419	11.9	Chr5: 115.597883	0.602	71	9.29e-09					1
36	1452137_at	Acbd3	acyl-Coenzyme A binding domain containing 3; exons 6 and 7	Chr1: 182.675240	7.513	11.9	Chr5: 138.337847	0.798	71	0	1						36	1457790_at	Asb3	ankyrin repeat and SOCS box-containing protein 3; distal 3' UTR	Chr11: 31.002163	5.697	22.9	Chr11: 29.456155	0.601	71	1.01e-08				1	1
37	1420607_at	Rbm18	RNA binding motif protein 18; third to last exon, last exon, and proximal 3' UTR	Chr2: 35.973160	9.789	14.8	Chr5: 138.337847	0.796	71	0	1	1			1		37	1422472_at	Pex13	peroxisomal biogenesis factor 13	Chr11: 23.546538	5.677	14.8	Chr4: 154.365177	0.601	71	1.04e-08
38	1420857_at	Lancl2	LanC (bacterial lantibiotic synthetase component C)-like 2; mid and distal half of 3' UTR	Chr6: 57.687959	9.456	13.8	Chr9: 40.929719	0.793	71	0			1	1	1		38	1438843_x_at	Mtch2	mitochondrial carrier homolog 2 (C. elegans)	Chr2: 90.701515	10.047	15.4	Chr12: 70.704784	0.601	71	1.04e-08
39	1421879_at	Mtmr1	myotubularin related protein 1; last exon and proximal 3' UTR	ChrX: 68.669901	9.351	11.4	Chr1: 25.489364	0.793	71	0	1	1			1		39	1423083_at	Rab33b	RAB33B, member of RAS oncogene family; distal 3' UTR	Chr3: 51.299259	10.295	9.9	Chr12: 69.125067	0.601	71	1.04e-08				1	1
40	1451726_at	Mtmr6	myotubularin related protein 6; mid 3' UTR	Chr14: 60.919908	11.038	16.6	Chr5: 138.337847	0.792	71	0			1		1		40	1418505_at	Nudt4	nudix (nucleoside diphosphate linked moiety X)-type motif 4; distal 3' UTR	Chr10: 95.010070	11.115	11.7	Chr1: 172.980820	0.6	71	1.11e-08				1	1
41	1421990_at	Syt1	synaptotagmin 1 (synaptic vesicle calcium sensor); proximal 3' UTR	Chr10: 107.937024	12.19	20.7	Chr5: 133.538653	0.792	71	0		1			1		41	1435747_at	Fgf14	fibroblast growth factor 14; distal 3' UTR	Chr14: 124.377720	8.176	14	Chr12: 76.396441	0.6	71	1.15e-08				1	1
42	1419544_at	Atp6v1c1	ATPase, H+ transporting, V1 subunit C, isoform 1 (vacuolar acidification, ubiquitous V1 domain C subunit); last four exons and proximal 3' UTR	Chr15: 38.616827	12.616	23.8	Chr5: 138.337847	0.79	71	0	1	1			1		42	1422835_at	Kcnd2	potassium voltage-gated channel, Shal-related family, member 2; distal 3' UTR	Chr6: 21.679205	11.715	12.9	Chr4: 13.764991	0.6	71	1.16e-08				1	1
43	1450104_at	Adam10	a disintegrin and metalloprotease domain 10; last 3 exons	Chr9: 70.616652	8.97	23	Chr5: 136.726447	0.79	71	0	1						43	1437490_x_at	Uap1	UDP-N-acetylglucosamine pyrophosphorylase 1; mid distal 3' UTR	Chr1: 172.072207	6.5	17	Chr12: 116.788761	0.599	71	1.19e-08			1	1	1
44	1453054_at	Scamp1	secretory carrier membrane protein 1; last three exons and proximal 3' UTR	Chr13: 94.973948	9.127	14.1	Chr16: 96.944467	0.789	71	0	1	1			1		44	1429623_at	Zfp644	zinc finger protein 644; mid 3' UTR	Chr5: 107.046480	9.802	15	Chr12: 76.396441	0.598	71	1.32e-08			1		1
45	1451109_a_at	Nedd4	neural precursor cell expressed, developmentally down-regulated gene 4 (ubiquitin ligase); mid-proximal 3' UTR	Chr9: 72.595447	11.875	15.1	Chr1: 35.595389	0.789	71	0		1	1		1		45	1456038_at	Fbxl4	F-box and leucine-rich repeat protein 4	Chr4: 22.354515	9.011	9.3	Chr19: 22.410451	0.598	71	1.34e-08
46	1431030_a_at	Rnf14	ring finger protein 14; last exon and 3' UTR	Chr18: 38.459433	9.669	19.4	Chr5: 138.337847	0.787	71	0	1				1		46	1439484_at	Pde7a	phosphodiesterase 7A; far 3' UTR	Chr3: 19.123293	7.922	15.4	Chr12: 115.166911	0.596	71	1.47e-08					1
47	1422900_at	Mgea5	meningioma expressed antigen 5 (hyaluronidase); last 2 exons and proximal 3' UTR	Chr19: 45.826386	11.079	18.2	Chr5: 138.337847	0.787	71	0	1	1			1		47	1428652_at	0610010F05Rik	RIKEN cDNA 0610010F05; distal 3' UTR	Chr11: 23.473924	10.429	10.2	Chr12: 76.396441	0.596	71	1.48e-08				1	1
48	1451846_at	Nebl	nebulette; mid 3' UTR	Chr2: 17.268823	8.075	11.3	Chr5: 138.337847	0.786	71	0			1		1		48	1424124_at	Mospd2	motile sperm domain containing 2; mid to distal 3' UTR	ChrX: 161.374227	8.198	13	Chr12: 114.553844	0.595	71	1.56e-08			1	1	1
49	1435242_at	Aprin	androgen-induced proliferation inhibitor; 3' UTR	Chr5: 151.610705	9.25	15.7	Chr1: 165.315110	0.782	71	0					1		49	1428928_at	Cacnb4	calcium channel voltage-dependent beta 4; distal 3' UTR	Chr2: 52.283909	10.44	14.6	Chr12: 76.396441	0.595	71	1.6e-08				1	1
50	1431052_at	Arhgap12	Rho GTPase activating protein 12	Chr18: 6.061855	7.144	15	Chr16: 97.799871	0.782	71	0							50	1435001_at	Plaa	phospholipase A2, activating protein; mid 3' UTR	Chr4: 94.233920	8.132	10.5	Chr4: 154.365177	0.594	71	1.77e-08			1		1
51	1425255_s_at	Hnrpll	heterogeneous nuclear ribonucleoprotein L-like (strong transQTL near Tyrp1); 5' UTR, all four exons, and 3' UTR	Chr17: 80.429718	10.802	16.2	Chr1: 25.632282	0.781	71	0	1				1		51	1446399_at	Cdh10	cadherin 10; far 3' UTR	Chr15: 18.945521	6.543	13	Chr12: 115.166911	0.594	71	1.77e-08					1
52	1432143_a_at	Hbp1	high mobility group box transcription factor 1; exons 5, 6, and 7	Chr12: 32.618340	8.696	14.3	Chr1: 157.588921	0.781	71	0	1						52	1433905_at	Akap7	A kinase (PRKA) anchor protein 7; distal 3' UTR	Chr10: 24.888993	10.561	9.7	Chr12: 76.832202	0.593	71	1.82e-08				1	1
53	1421198_at	Itgav	integrin, alpha V (vitronectin receptor, alpha polypeptide, antigen CD51); last exon and 3' UTR	Chr2: 83.643396	7.184	17.3	Chr5: 133.538653	0.781	71	0	1				1		53	1438750_at	Atrx	alpha thalassemia/mental retardation syndrome X-linked; intron 10	ChrX: 103.060901	5.691	9.5	Chr5: 118.405615	0.592	71	1.93e-08
54	1425861_x_at	Cacna2d1	calcium channel, voltage-dependent, alpha2/delta subunit 1; distal or far 3' UTR	Chr5: 15.876934	7.703	10.9	Chr5: 138.337847	0.78	71	0				1	1		54	1429131_at	Ube2v2	ubiquitin-conjugating enzyme E2 variant 2; distal 3' UTR	Chr16: 15.552862	9.647	16.9	Chr12: 115.166911	0.592	71	1.98e-08				1	1
55	1443612_at	Ano3	anoctamin 3 (transmembrane protein 16C); 3' UTR	Chr2: 110.497150	9.615	13.5	Chr5: 138.337847	0.778	71	0					1		55	1432393_a_at	Icf45	interphase cyctoplasmic foci protein 45; exons 3 and 4	Chr11: 45.765047	7.338	148.3	Chr11: 44.552712	-0.592	71	1.99e-08	1
56	1431606_a_at	Angel2	angel 2	Chr1: 192.761338	7.701	20.3	Chr16: 96.944467	0.777	71	0							56	1453211_at	1700019B01Rik	RIKEN cDNA 1700019B01 gene	Chr7: 97.576645	4.926	14.9	Chr4: 154.365177	0.592	71	2.04e-08
57	1455480_s_at	Ube2d3	ubiquitin-conjugating enzyme E2D 3 (UBC4/5 homolog); exons 1 through 4	Chr3: 135.102686	10.911	14.9	Chr1: 35.595389	0.776	71	0	1						57	1418887_a_at	D11Wsu99e	DNA segment, Chr 11, Wayne State University 99, expressed; distal 3' UTR (interleaved on opposite strand with Cog1)	Chr11: 113.522690	9.535	15.9	Chr4: 154.365177	0.591	71	2.07e-08				1	1
58	1423743_at	Arcn1	archain 1; last two exons and proximal 3' UTR	Chr9: 44.553529	9.746	17.8	Chr5: 133.538653	0.776	71	0	1	1			1		58	1419453_at	Uchl5	ubiquitin carboxyl-terminal esterase L5	Chr1: 145.654161	5.422	11.5	Chr12: 114.553844	0.591	71	2.12e-08
59	1437257_at	Wdr47	WD repeat domain 47; exons 4 and 5	Chr3: 108.421747	9.092	18.2	Chr5: 138.337847	0.775	71	0	1						59	1434398_at	Nkrf	NF-kappaB repressing factor; distal end of 3' UTR	ChrX: 34.427562	9.09	15.1	Chr4: 154.365177	0.591	71	2.13e-08				1	1
60	1450908_at	Eif4e	eukaryotic translation initiation factor 4E (mRNA cap-binding protein); proximal 3' UTR	Chr3: 138.218555	11.845	20.1	Chr5: 138.337847	0.775	71	0		1			1		60	1434550_at	3830406C13Rik	RIKEN cDNA 3830406C13 gene	Chr14: 13.135260	7.082	12.2	Chr14: 21.831603	0.591	71	2.16e-08
61	1423297_at	Add3	adducin 3 (gamma); proximal 3' UTR	Chr19: 53.319976	10.129	15.3	Chr5: 133.538653	0.773	71	0		1			1		61	1456199_x_at	Ranbp9	RAN binding protein 9; distal 3' UTR	Chr13: 43.498753	11.247	14.3	Chr2: 162.502590	0.59	71	2.3e-08				1	1
62	1423040_at	Bzw1	basic leucine zipper and W2 domains 1; last 2 exons and proximal 3' UTR	Chr1: 58.461077	10.011	14.8	Chr1: 35.595389	0.773	71	0	1	1			1		62	1451979_at	Kras	v-Ki-ras2 Kirsten rat sarcoma viral oncogene; distal 3' UTR	Chr6: 145.168037	10.521	20.2	Chr6: 145.406059	0.59	71	2.31e-08				1	1
63	1426635_at	Acbd3	acyl-Coenzyme A binding domain containing 3; last exon and proximal 3' UTR	Chr1: 182.682325	8.244	12.5	Chr5: 138.337847	0.773	71	0	1	1			1		63	1416445_at	Fam98a	family with sequence similarity 98, member A; distal half of 3' UTR	Chr17: 75.936588	10.417	18.3	Chr1: 172.980820	0.59	71	2.36e-08				1	1
64	1425650_at	Tle4	transducin-like enhancer of split 4, homolog of Drosophila E(spl); last four exons	Chr19: 14.526161	8.333	14.2	Chr5: 133.538653	0.772	71	0	1						64	1452239_at	Gt(ROSA)26Sor	gene trap ROSA 26, Philippe Soriano (between Thumpd3 and Setd5); putative 3' end exon or 3' UTR, expressed even in normal mice	Chr6: 113.020600	8.112	11.5	Chr10: 114.515889	0.589	71	2.39e-08	1				1
65	1454043_a_at	Kcnab1	potassium voltage-gated channel, shaker-related subfamily, beta member 1; last exon and proximal 3' UTR	Chr3: 65.180409	9.977	14	Chr5: 133.538653	0.772	71	0	1	1			1		65	1455053_a_at	Dcun1d1	defective in cullin neddylation 1, domain containing 1; distal 3' UTR	Chr3: 35.792095	7.273	8.5	Chr5: 115.597883	0.589	71	2.42e-08				1	1
66	1430640_a_at	Prkar2b	protein kinase, cAMP dependent regulatory, type II beta; last three exons and 3' end intron	Chr12: 32.645283	8.225	10.1	Chr5: 138.337847	0.771	71	0	1						66	1427984_at	Senp6	SUMO/sentrin specific protease 6; distal 3' UTR	Chr9: 79.992177	7.772	9.1	Chr4: 141.171040	0.589	71	2.46e-08				1	1
67	1436393_a_at	Trim37	tripartite motif protein 37; last exon	Chr11: 87.031778	10.883	21.6	Chr5: 133.538653	0.771	71	0	1						67	1441470_at	LOC51057	hypothetical protein LOC51057; intron or distal 3' UTR of short form message	Chr11: 21.650433	4.767	14.4	Chr4: 13.764991	0.588	71	2.64e-08				1	1
68	1426679_at	Znf706	zinc finger protein 706; las two exons and proximal 3' UTR	Chr15: 36.930635	11.239	24	Chr5: 138.337847	0.771	71	0	1	1			1		68	1450873_at	Gtpbp4	GTP binding protein 4 (nucleolar GTP-binding protein 1, chronic renal failure gene protein)	Chr13: 8.972048	9.393	11.6	Chr1: 172.980820	0.587	71	2.88e-08
69	1421839_at	Abca1	ATP-binding cassette, sub-family A (ABC1), member 1; mid-proximal 3' UTR	Chr4: 53.045875	7.94	14.1	Chr1: 25.632282	0.77	71	0		1	1		1		69	1441693_at	Adamts3	ADAM metallopeptidase with thrombospondin type 1 motif, 3 (dermatosparaxis); putative far 3' UTR	Chr5: 90.103986	8.113	20.9	Chr12: 114.553844	0.587	71	2.92e-08					1
70	1421095_a_at	Trpc1	transient receptor potential cation channel, subfamily C, member 1; last 3 exons	Chr9: 95.607179	7.994	12.2	Chr5: 133.538653	0.77	71	0	1						70	1418066_at	Cfl2	cofilin 2, muscle; distal 3' UTR	Chr12: 55.959842	9.279	21.9	Chr12: 55.988945	0.587	71	2.94e-08				1	1
71	1427255_s_at	Zfp445	zinc finger protein 445; putative far 3' UTR	Chr9: 122.759531	10.485	18.2	Chr5: 138.337847	0.77	71	0					1		71	1426405_at	Rnf11	ring finger protein 11; far 3' UTR	Chr4: 109.124931	7.129	12.5	Chr10: 112.836908	0.586	71	2.99e-08					1
72	1421318_at	Ndst4	similar to N-deacetylase/N-sulfotransferase 4	Chr3: 125.427972	7.547	17.1	Chr2: 77.938377	0.768	71	0							72	1434593_at	Eif5a2	eukaryotic translation initiation factor 5A2	Chr3: 28.697199	9.061	10.6	Chr5: 118.405615	0.586	71	3.03e-08
73	1427490_at	Abcb7	ATP-binding cassette, sub-family B (MDR/TAP), member 7 (X-linked sideroblastic anemia with ataxia, mitochondrial iron homeostasis); 3' UTR	ChrX: 101.478824	7.499	15.9	Chr5: 138.337847	0.768	71	0					1		73	1427418_a_at	Hif1a	hypoxia inducible factor 1, alpha; mid 3' UTR	Chr12: 75.047280	11.2	16.3	Chr12: 69.125067	0.586	71	3.05e-08			1		1
74	1451738_at	Ogt	O-linked N-acetylglucosamine (GlcNAc) transferase (UDP-N-acetylglucosamine:polypeptide-N-acetylglucosaminyl transferase); last four exons	ChrX: 98.874054	10.797	23.4	Chr5: 138.337847	0.768	71	0	1						74	1428557_a_at	Osgepl1	O-sialoglycoprotein endopeptidase-like 1; exon 3	Chr1: 53.376885	8.295	13.9	Chr12: 57.107314	0.585	71	3.24e-08	1
75	1448375_at	Smbp	SWI/SNF related, matrix associated, actin dependent regulator of chromatin, subfamily e, member 1	Chr19: 41.287634	7.887	13.3	Chr5: 140.893042	0.767	71	0							75	1442073_at	2300002C06Rik	long terminal repeat element of RIKEN cDNA 2300002C06; LTR maps to Chr 1	Chr1: 52.842442	6.68	9.9	Chr12: 114.496726	0.584	71	3.58e-08
76	1445691_at	Chn1	chimerin (chimaerin) 1; mid 3' UTR	Chr2: 73.449941	10.922	16.4	Chr5: 138.337847	0.766	71	0			1		1		76	1444351_at	Cyfip2	cytoplasmic FMR1 interacting protein 2	Chr11: 46.016262	6.312	55.7	Chr11: 44.552712	-0.583	71	3.74e-08
77	1425497_a_at	Prpf4b	PRP4 pre-mRNA processing factor 4 homolog B; last 3 exons	Chr13: 34.991068	9.483	13.9	Chr5: 132.603108	0.766	71	0	1						77	1458273_at	Hnrpd	heterogeneous nuclear ribonucleoprotein D; distal 3' UTR	Chr5: 100.385025	7.944	13.2	Chr5: 98.239477	0.583	71	3.74e-08				1	1
78	1430205_a_at	Cdc37l1	cell division cycle 37 homolog-like 1; exons 4 and 5	Chr19: 29.081461	8.935	15.3	Chr5: 133.538653	0.765	71	0	1						78	1428468_at	3110043O21Rik	RIKEN cDNA 3110043O21 gene	Chr4: 35.138691	8.904	13.2	Chr5: 123.738718	0.583	71	3.78e-08
79	1427559_a_at	Atf2	activating transcription factor 2; last three exons	Chr2: 73.657017	9.481	16.5	Chr5: 133.538653	0.764	71	0	1						79	1448212_at	Tnfsf5ip1	CD40 ligand-activated specific transcript 3; last three exons and very proximal 3' UTR	Chr18: 67.808439	9.895	12.3	Chr12: 70.704784	0.583	71	3.83e-08	1	1			1
80	1438362_x_at	2310035C23Rik	RIKEN cDNA 2310035C23 KIAA1468 protein; central exon	Chr1: 107.616027	6.315	11.2	Chr2: 77.938377	0.764	71	0	1						80	1433835_at	Ppp3cb	protein phosphatase 3, catalytic subunit, beta (calmodulin-dependent calcineurin A subunit beta isoform)	Chr14: 21.327089	8.608	14.1	Chr5: 118.405615	0.582	71	3.96e-08
81	1447745_at	Aqp4	aquaporin 4 (kidney basolateral resorption, astrocyte expressed, neuromyelitis optica); putative far 3' UTR	Chr18: 15.550690	9.242	12.6	Chr5: 138.337847	0.764	71	2.22e-16					1		81	1456141_x_at	C6-1a	complement component 6, 1a protein	ChrX: 72.697895	5.474	14.8	Chr4: 154.365177	0.582	71	4.04e-08
82	1448192_s_at	Prps1	phosphoribosyl pyrophosphate synthetase 1; exons 4, 5, and 6	ChrX: 137.003408	10.564	15.8	Chr5: 138.337847	0.764	71	2.22e-16	1						82	1459905_at	6430411K18Rik	RIKEN cDNA 6430411K18 gene	Chr3: 88.018583	8.738	8.9	Chr4: 62.368290	-0.582	71	4.1e-08
83	1420858_at	Pkia	protein kinase inhibitor, alpha (hippocampal CA2-3 and DG expression signature); mid 3' UTR	Chr3: 7.443522	10.143	12.3	Chr6: 145.406059	0.764	71	2.22e-16			1		1		83	1415678_at	Ppm1a	protein phosphatase 1A, magnesium dependent, alpha; 3' UTR	Chr12: 73.894951	11.63	13.3	Chr12: 76.396441	0.582	71	4.15e-08					1
84	1423322_at	Lin7c	Lin-7 type 3 (Veli3-CASK-Mint1 complex, PDZ domain, synapse and cell-cell junction associated, NMDA synaptic receptor complex chaperone); mid distal 3' UTR	Chr2: 109.739847	11.298	13.4	Chr1: 27.321155	0.763	71	2.22e-16			1	1	1		84	1455150_at	Phka2	phosphorylase kinase alpha 2	Chr1: 53.863771	7.121	13.2	Chr5: 3.143127	0.582	71	4.16e-08
85	1422702_at	Oazin	ornithine decarboxylase antizyme 3	Chr15: 38.419679	10.336	12.3	Chr5: 138.337847	0.762	71	2.22e-16							85	1437069_at	Osbpl8	oxysterol binding protein-like 8; distal 3' UTR	Chr10: 110.733934	9.634	9.7	Chr17: 55.490261	0.581	71	4.23e-08				1	1
86	1431197_at	Arl6ip2	ADP-ribosylation factor-like 6 interacting protein 2; first 2 exons	Chr17: 80.275114	8.478	22.2	Chr5: 138.337847	0.761	71	2.22e-16	1						86	1423883_at	Acsl1	acyl-CoA synthetase long-chain family member 1	Chr8: 47.620842	10.302	15.8	Chr12: 116.788761	0.581	71	4.29e-08
87	1421491_a_at	Tmem49	transmembrane protein 49; exons 5, 6, 7, and 8	Chr11: 86.420714	10.752	11.3	Chr1: 157.588921	0.76	71	2.22e-16	1						87	1433511_at	Gtf2a1	general transcription factor II A, 1; putative far 3' UTR	Chr12: 92.793739	7.895	17.9	Chr12: 114.553844	0.581	71	4.31e-08					1
88	1425516_at	Ogt	O-linked N-acetylglucosamine (GlcNAc) transferase (UDP-N-acetylglucosamine:polypeptide-N-acetylglucosaminyl transferase); mid 3' UTR	ChrX: 98.878141	10.964	16.1	Chr5: 132.603108	0.759	71	2.22e-16			1		1		88	1434404_at	C030011O14Rik	RIKEN cDNA C030011O14 gene	Chr3: 151.936982	10.552	13.8	Chr12: 112.426348	0.581	71	4.33e-08
89	1447944_at	Zkscan1	zinc finger protein with KRAB and SCAN domains 1; mid proximal 3' UTR	Chr5: 138.543535	8.076	29.9	Chr5: 138.337847	0.758	71	2.22e-16		1	1		1		89	1420821_at	Sgpp1	sphingosine-1-phosphate phosphatase 1; mid-distal 3' UTR	Chr12: 76.815687	7.28	18.3	Chr12: 76.832202	0.581	71	4.42e-08			1	1	1
90	1454032_at	Neto2	neuropilin (NRP) and tolloid (TLL)-like 2; last exon and proximal 3' UTR	Chr8: 88.164117	7.866	11.2	Chr15: 63.151781	0.758	71	2.22e-16	1	1			1		90	1448584_at	Rsrc1	arginine/serine-rich coiled-coil 1; distal 3' UTR	Chr3: 67.161750	9.121	14.3	Chr12: 118.628399	0.58	71	4.59e-08				1	1
91	AFFX-TransRecMur/X57349_3_at	Tfrc	transferrin receptor; last three exons 16, 17, and 18 (3' most probe set used to assess reverse transcription efficiency)	Chr16: 32.626712	7.354	16.6	Chr1: 157.588921	0.757	71	4.44e-16	1						91	1451451_at	Gca	grancalcin; mid distal 3' UTR	Chr2: 62.530955	5.139	18.5	Chr12: 114.553844	0.58	71	4.78e-08			1	1	1
92	1452297_at	Ccnt2	cyclin T2; putative far 3' UTR	Chr1: 129.702895	9.083	14.2	Chr5: 140.893042	0.757	71	4.44e-16					1		92	1456261_at	Sh3kbp1	SH3-domain kinase binding protein 1	ChrX: 156.413279	7.077	14.6	Chr12: 76.396441	0.579	71	5e-08
93	1425175_at	C1ql3	complement C1q-like protein 3; mid to distal 3' UTR	Chr2: 12.925159	11.274	16.9	Chr5: 142.540279	0.757	71	4.44e-16			1	1	1		93	1421640_a_at	Tank	TRAF family member-associated Nf-kappa B activator; last exon and 3' UTR	Chr2: 61.491604	8.309	12.5	Chr12: 69.125067	0.579	71	5.03e-08	1				1
94	1440318_at	Wdr35	WD repeat domain 35	Chr12: 8.992878	8.059	13.7	Chr5: 136.726447	0.757	71	4.44e-16							94	1436859_at	2700007P21Rik	protein LOC120534; distal 3' UTR	Chr2: 106.802824	9.572	14.8	Chr1: 172.980820	0.578	71	5.29e-08				1	1
95	1450845_a_at	Bzw1	basic leucine zipper and W2 domains 1; proximal 3' UTR	Chr1: 58.462185	10.691	16.6	Chr1: 168.913137	0.757	71	4.44e-16		1			1		95	1425537_at	Ppm1a	protein phosphatase 1A, magnesium dependent, alpha; distal 3' UTR or third to last intron	Chr12: 73.889909	9.685	14.9	Chr12: 114.496726	0.578	71	5.32e-08				1	1
96	1419030_at	Ero1l	ERO1-like (oxidative ER protein folding, endoplasmic oxidoreductin-1-like protein); distal 3' UTR	Chr14: 45.904128	9.259	15.2	Chr1: 35.595389	0.756	71	4.44e-16				1	1		96	1436777_at	Mars2	methionine-tRNA synthetase 2 (mitochondrial); distal to mid 3' UTR	Chr1: 55.296340	5.421	16.1	Chr12: 76.396441	0.578	71	5.52e-08			1	1	1
97	1419191_at	Hipk3	homeodomain interacting protein kinase 3; last exon	Chr2: 104.270013	7.299	13.6	Chr5: 133.538653	0.756	71	4.44e-16	1						97	1434840_at	Hrb	HIV-1 Rev binding protein	Chr1: 82.896998	10.561	8.4	Chr12: 76.396441	0.577	71	5.65e-08
98	1420545_a_at	Chn1	chimerin (chimaerin) 1; last three exons	Chr2: 73.451176	13.735	16.2	Chr5: 140.893042	0.756	71	4.44e-16	1						98	1428643_at	Mgat5	mannoside acetylglucosaminyltransferase 5; putative far 3' UTR (overlaps anti-sense strand of 2610024A01Rik)	Chr1: 129.383342	9.401	12.9	Chr12: 114.553844	0.577	71	5.9e-08					1
99	1419644_at	Cstf2	cleavage stimulation factor, 3' pre-RNA, subunit 2, 64kDa; last three exons and proximal 3' UTR	ChrX: 130.609233	8.74	11.8	Chr5: 133.538653	0.755	71	4.44e-16	1	1			1		99	1435164_s_at	Ube1c	ubiquitin-activating enzyme E1C; mid-distal 3' UTR	Chr6: 97.134117	10.045	12.7	Chr4: 154.365177	0.576	71	6.01e-08			1	1	1
100	1433491_at	Epb4.1l2	erythrocyte protein band 4.1-like 2; last 4 exons	Chr10: 25.223941	8.612	16.4	Chr5: 132.603108	0.755	71	4.44e-16	1						100	1437475_at	Xrn1	5'-3' exoribonuclease 1; distal 3' UTR	Chr9: 95.957744	7.849	11.7	Chr4: 13.764991	0.576	71	6.03e-08				1	1
										SUMMARY	60	36	16	5	61												SUMMARY	7	3	18	46	67
